# Supplementary material
Source: PubMed Central journal article supplement (PMC3065210)
Supplement: ic200014w_si_001.pdf [file ic200014w_si_001.pdf]

## Supporting Information

### A Trimethylene versus an Ethylene Cross-bridged Tetraazamacrocyclic and *in vitro/in vivo* Comparisons of their Copper(II) Complexes

Antoinette Y. Odendaal,<sup>\*</sup> Ashley L. Fiamengo,<sup>5</sup> Riccardo Ferdani,<sup>5</sup> Thaddeus J. Wadas,<sup>5</sup> Daniel C. Hill,<sup>\*</sup> Yijie Peng,<sup>\*</sup> Katie J. Heroux,<sup>1</sup> James A. Golen,<sup>+</sup> Arnold L. Rheingold,<sup>1</sup> Carolyn J. Anderson,<sup>5\*</sup> Gary R. Weisman<sup>\*\*</sup> and Edward H. Wong<sup>\*\*</sup>

<sup>\*</sup>Department of Chemistry, University of New Hampshire, 23 Academic Way, Durham, New Hampshire 03824, <sup>5</sup>Mallinckrodt Institute of Radiology, Washington University School of Medicine, 510 Kingshighway Boulevard, Campus Box 8225, St. Louis, Missouri 63110, and <sup>1</sup>Department of Chemistry and Biochemistry, University of California, San Diego, La Jolla, California, 92093, <sup>+</sup>Department of Chemistry and Biochemistry, University of Massachusetts, Dartmouth, North Dartmouth, Massachusetts, 02747, USA

#### Table of Contents

|                                                  | <u>Page</u> |
|--------------------------------------------------|-------------|
| NMR Spectra of H <sub>2</sub> - <b>1</b> •HBr    | S2          |
| NMR Spectra of H <sub>2</sub> - <b>2</b> •3.7TFA | S3-S4       |
| NMR Spectra of <b>4</b> •HBr                     | S5-S7       |
| NMR Spectra of <b>5</b>                          | S8-S9       |
| NMR Spectra of <b>7</b>                          | S10-S12     |
| NMR Spectra of <b>8</b>                          | S13-S14     |
| NMR Spectra of <b>9</b>                          | S15-S16     |
| NMR Spectra of <b>10</b>                         | S17-S18     |
| X-ray Data for C3B-DO2A ( <b>11</b> )            | S19-S31     |
| X-ray Data for CB-TR2A ( <b>12</b> )             | S32-S67     |

# NMR Spectra of H<sub>2</sub>-1•HBr

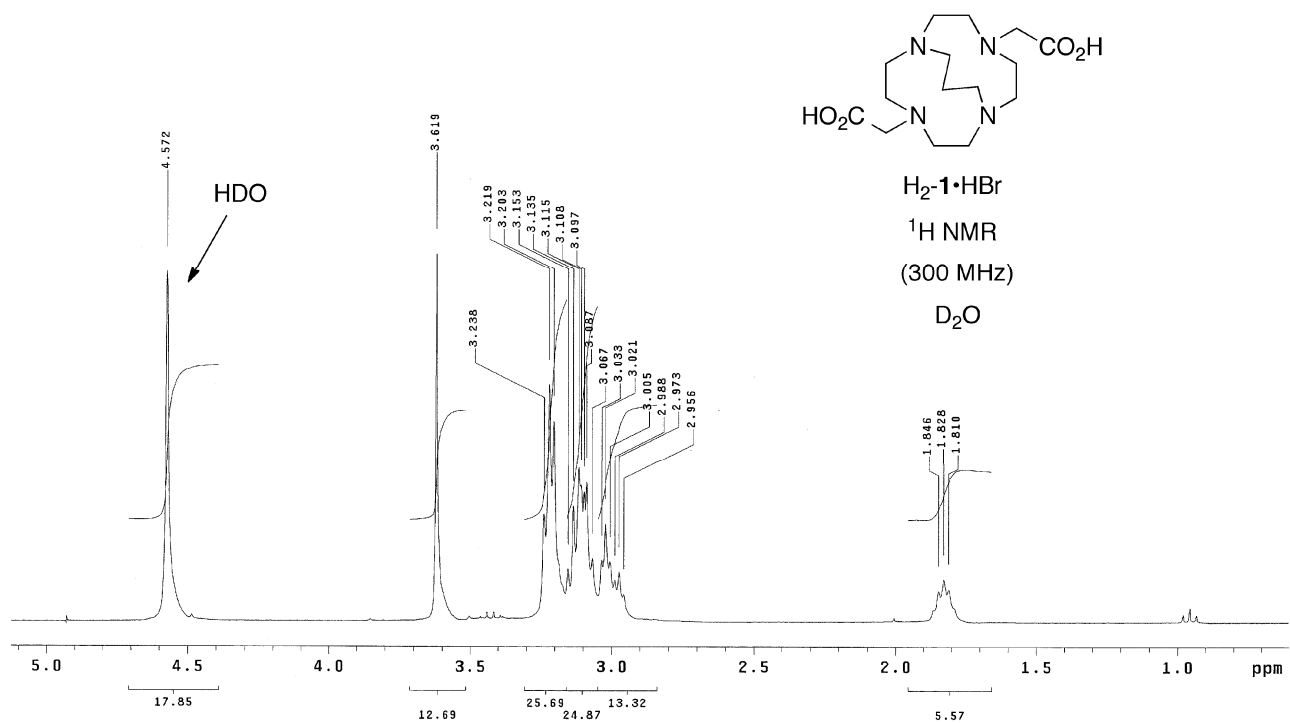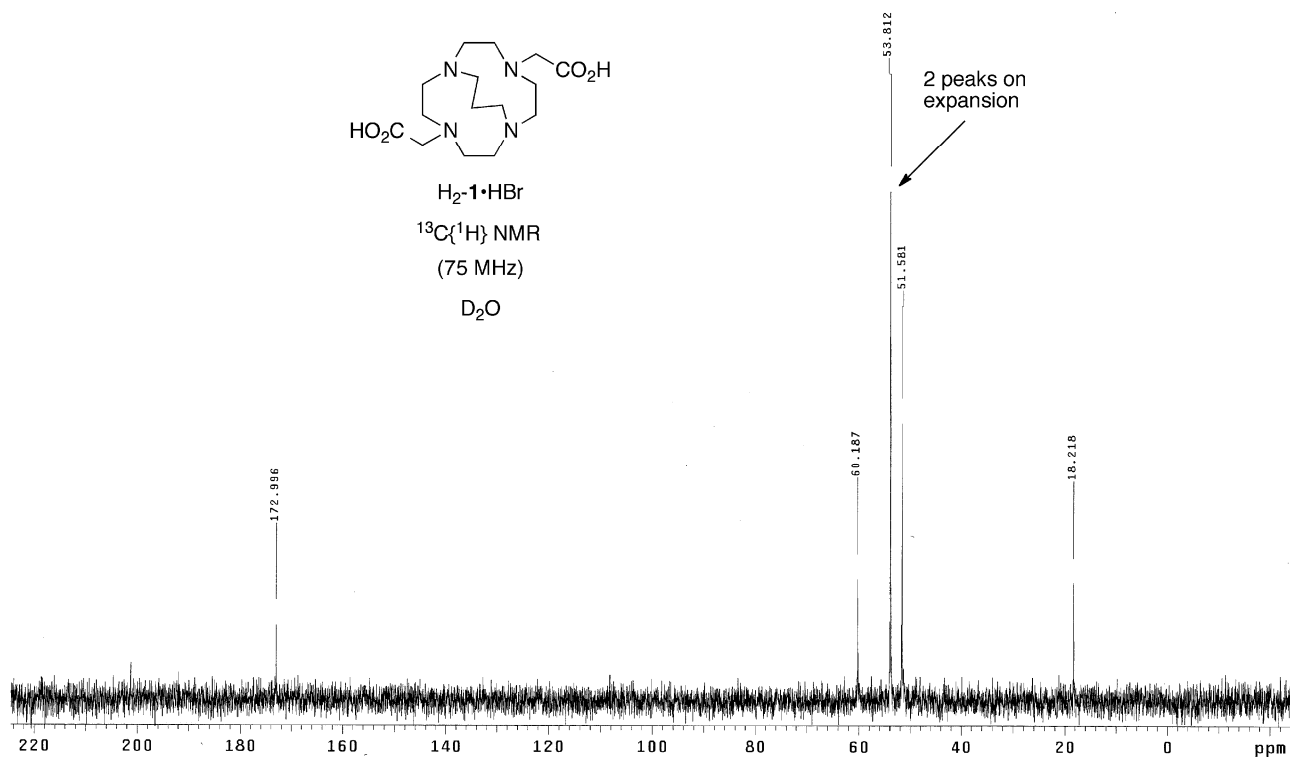

NMR Spectra of H<sub>2</sub>-2•3.7TFA

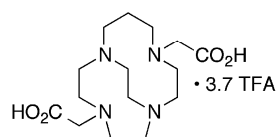

**H<sub>2</sub>-2**  
<sup>1</sup>H NMR  
(500 MHz)  
CD<sub>3</sub>CN  
(central peak of CHD<sub>2</sub>CN  
set at δ 1.94)

CHD<sub>2</sub>CN

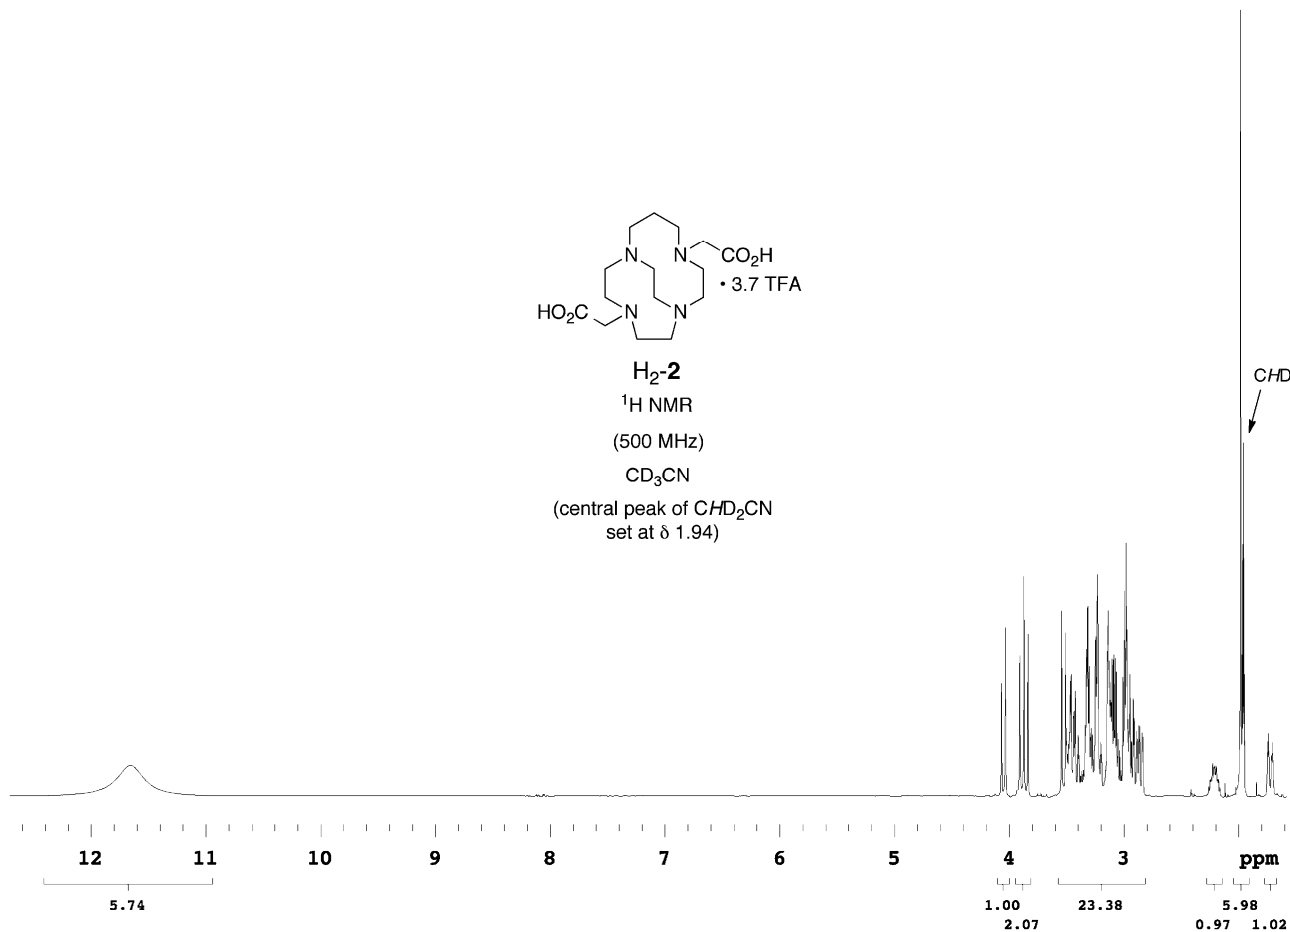

cont. - NMR Spectra of H<sub>2</sub>-2•3.7TFA

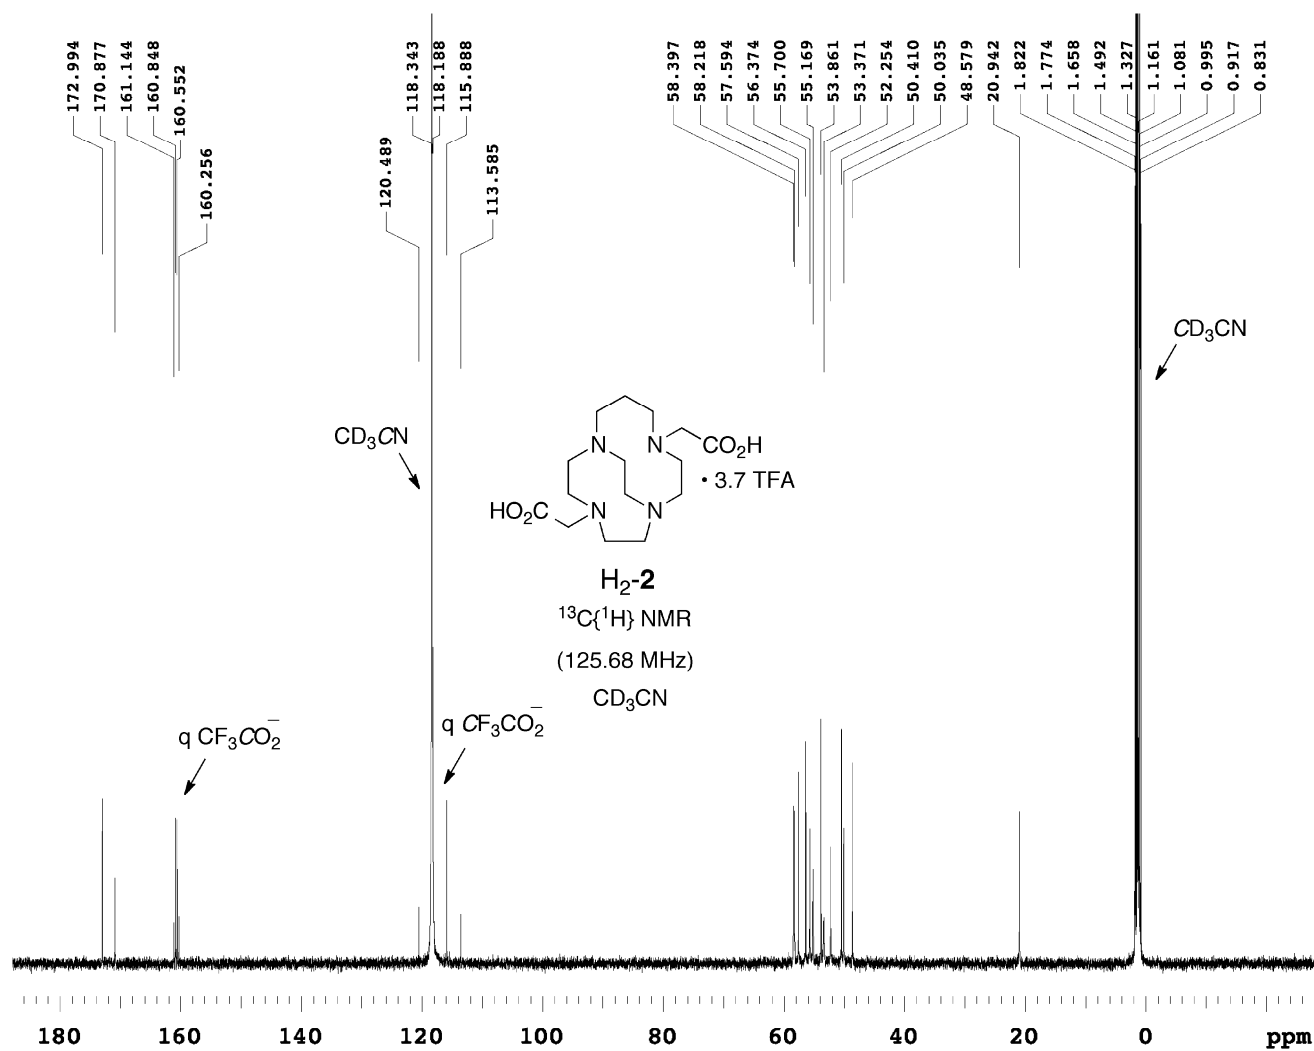

# NMR Spectra of 4•HBr

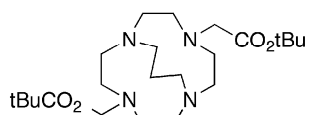

4•HBr

<sup>1</sup>H NMR

(300 MHz)

(CD<sub>3</sub>)<sub>2</sub>SO

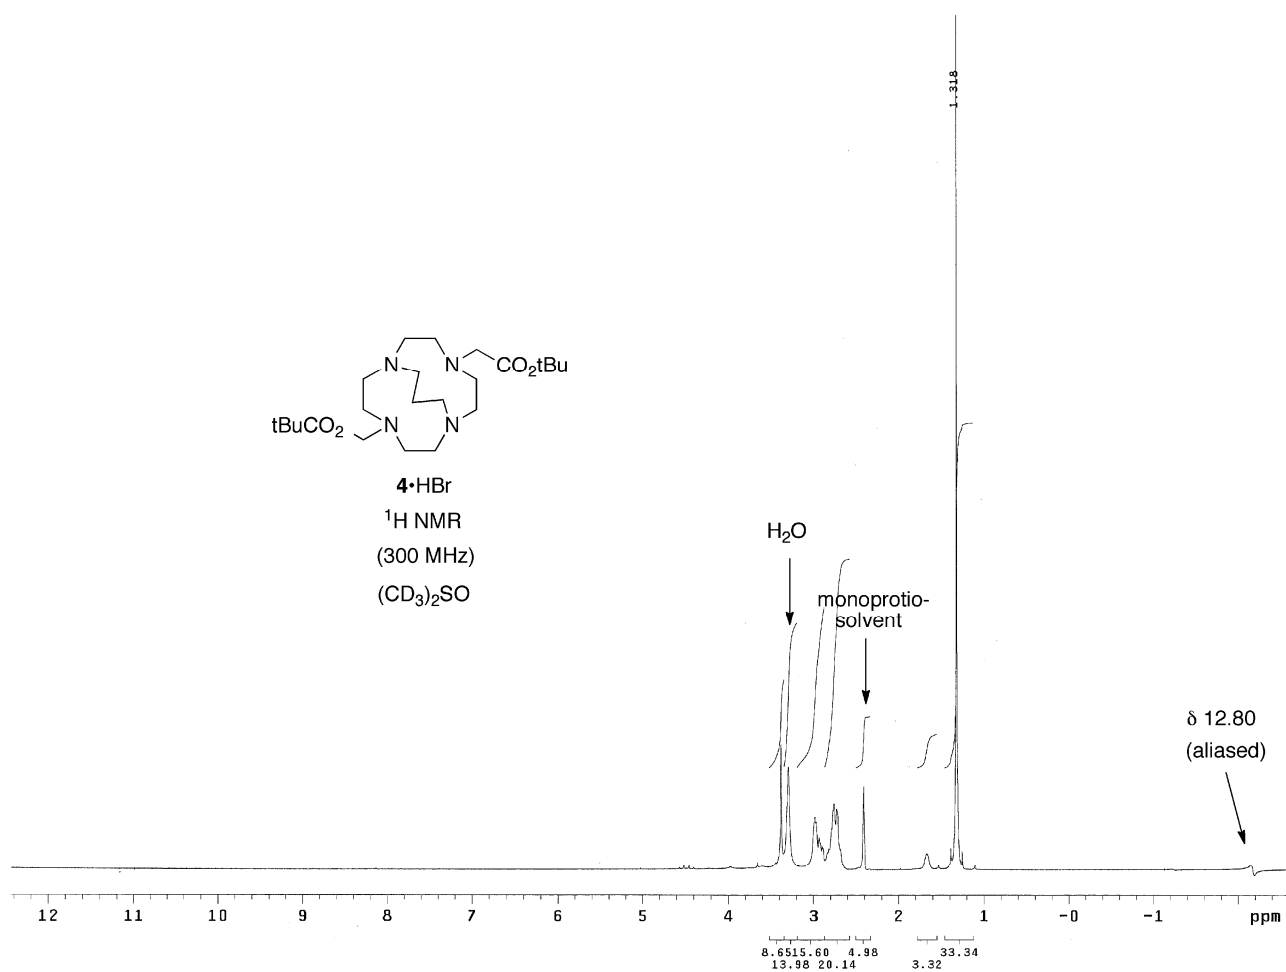

cont. - NMR Spectra of **4**•HBr

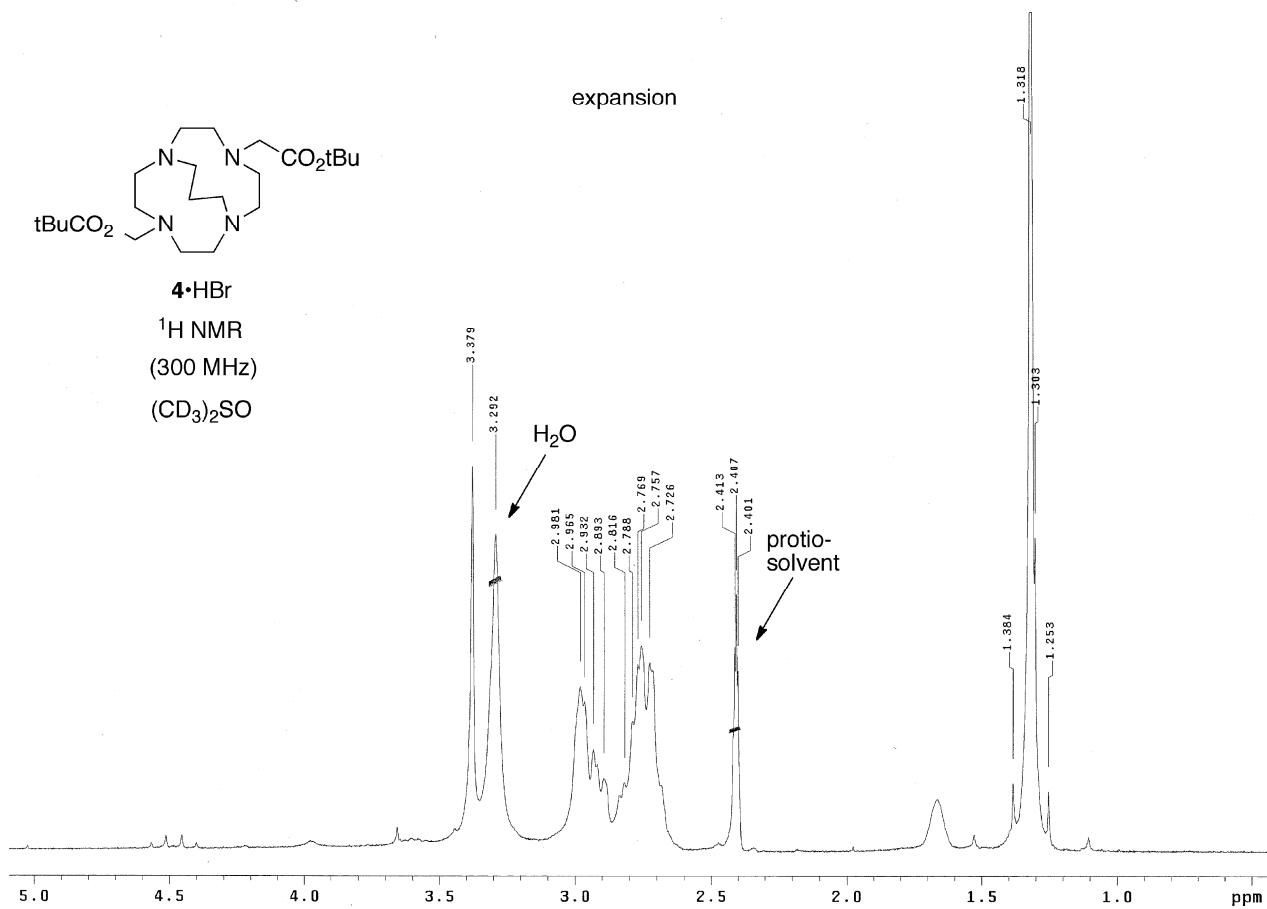

cont. - NMR Spectra of **4**•HBr

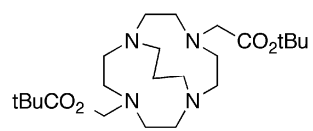

**4**•HBr

$^{13}\text{C}\{^1\text{H}\}$  NMR

(75 MHz)

$(\text{CD}_3)_2\text{SO}$

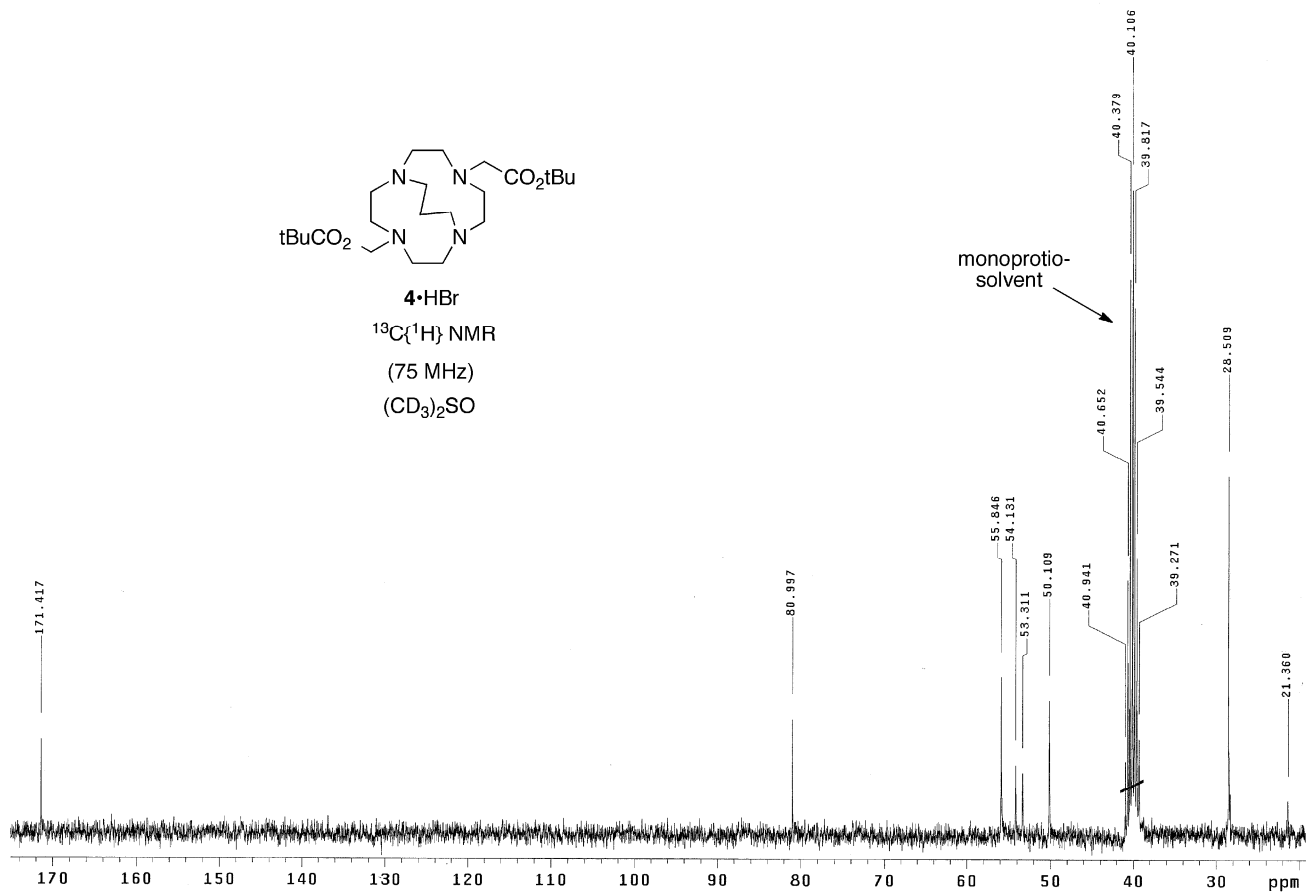

NMR Spectra of 5

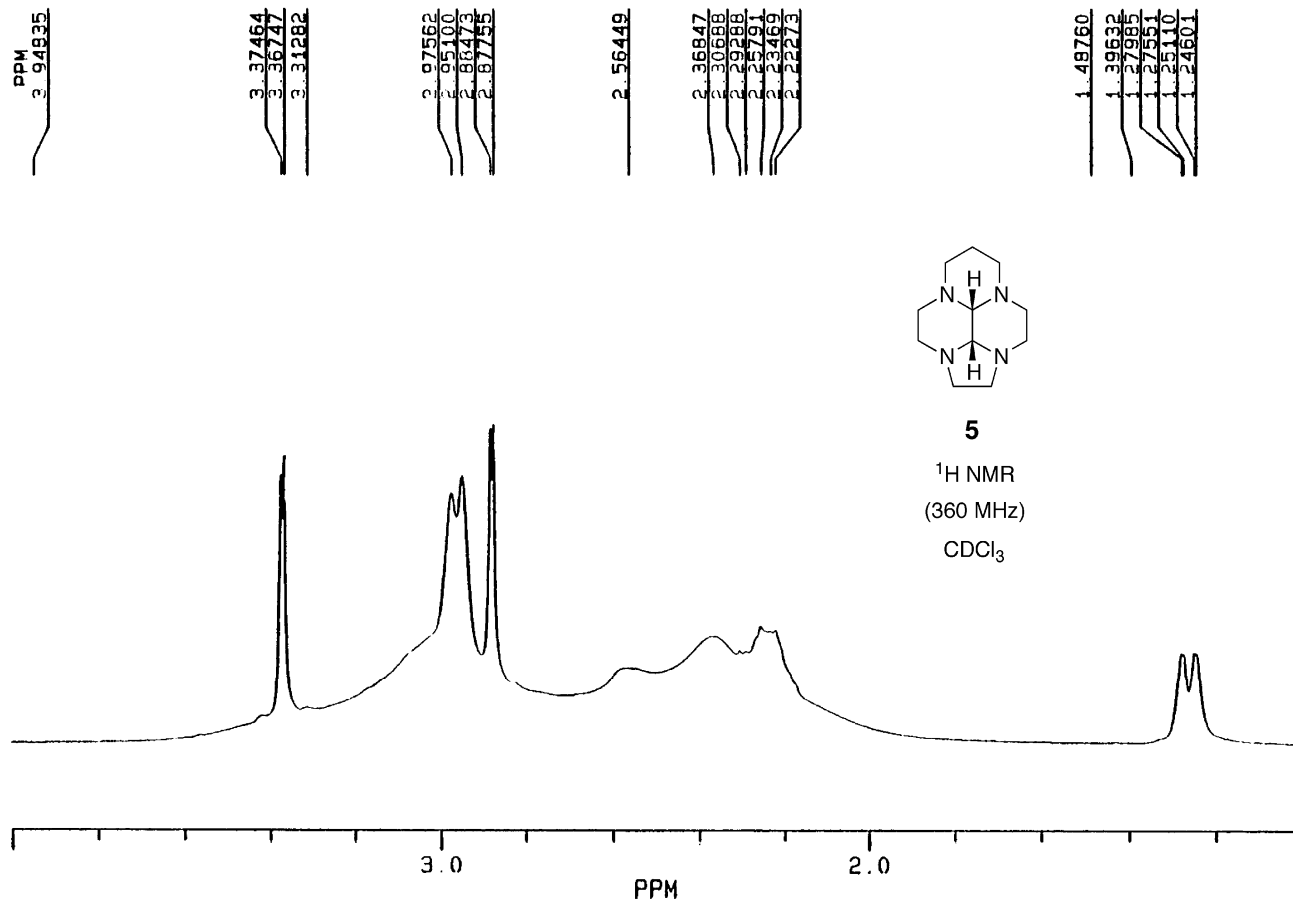



cont. - NMR Spectra of **5**

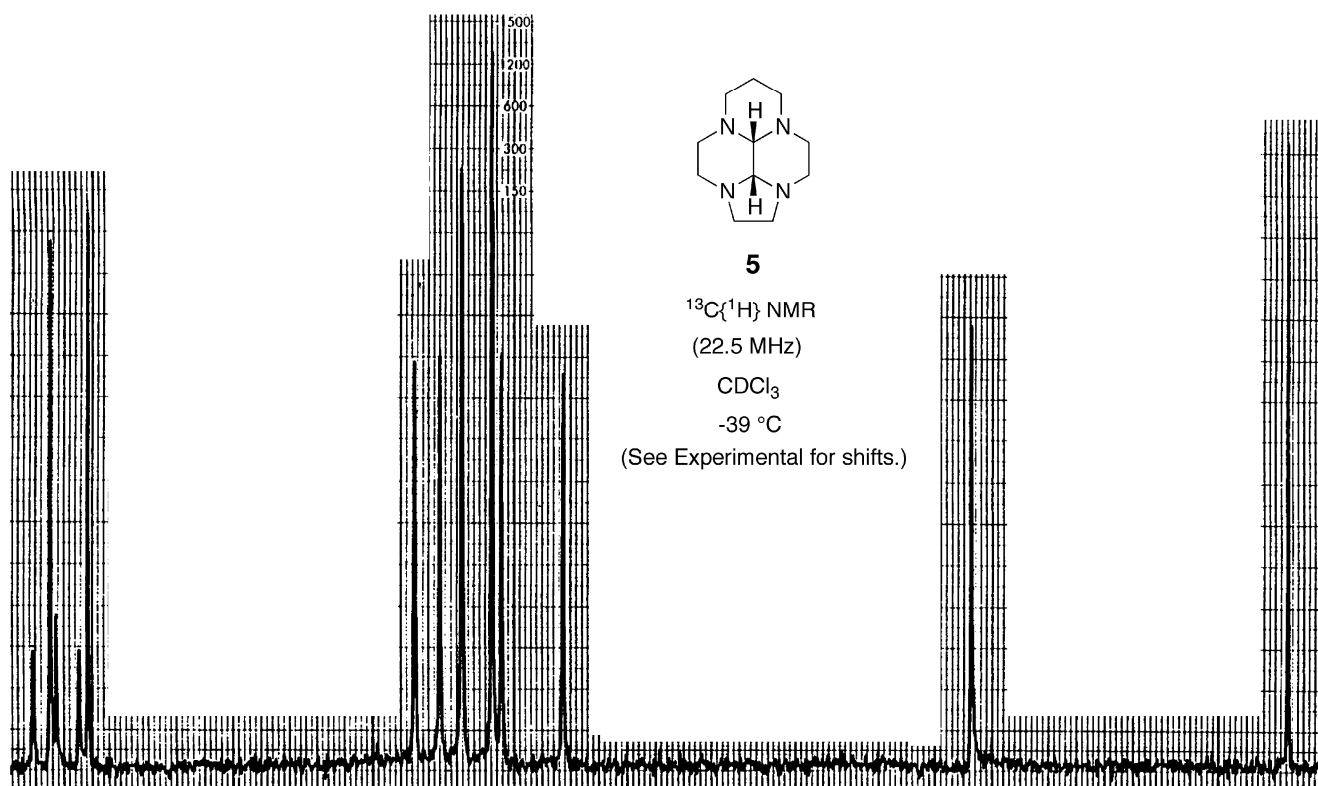

NMR Spectra of 7

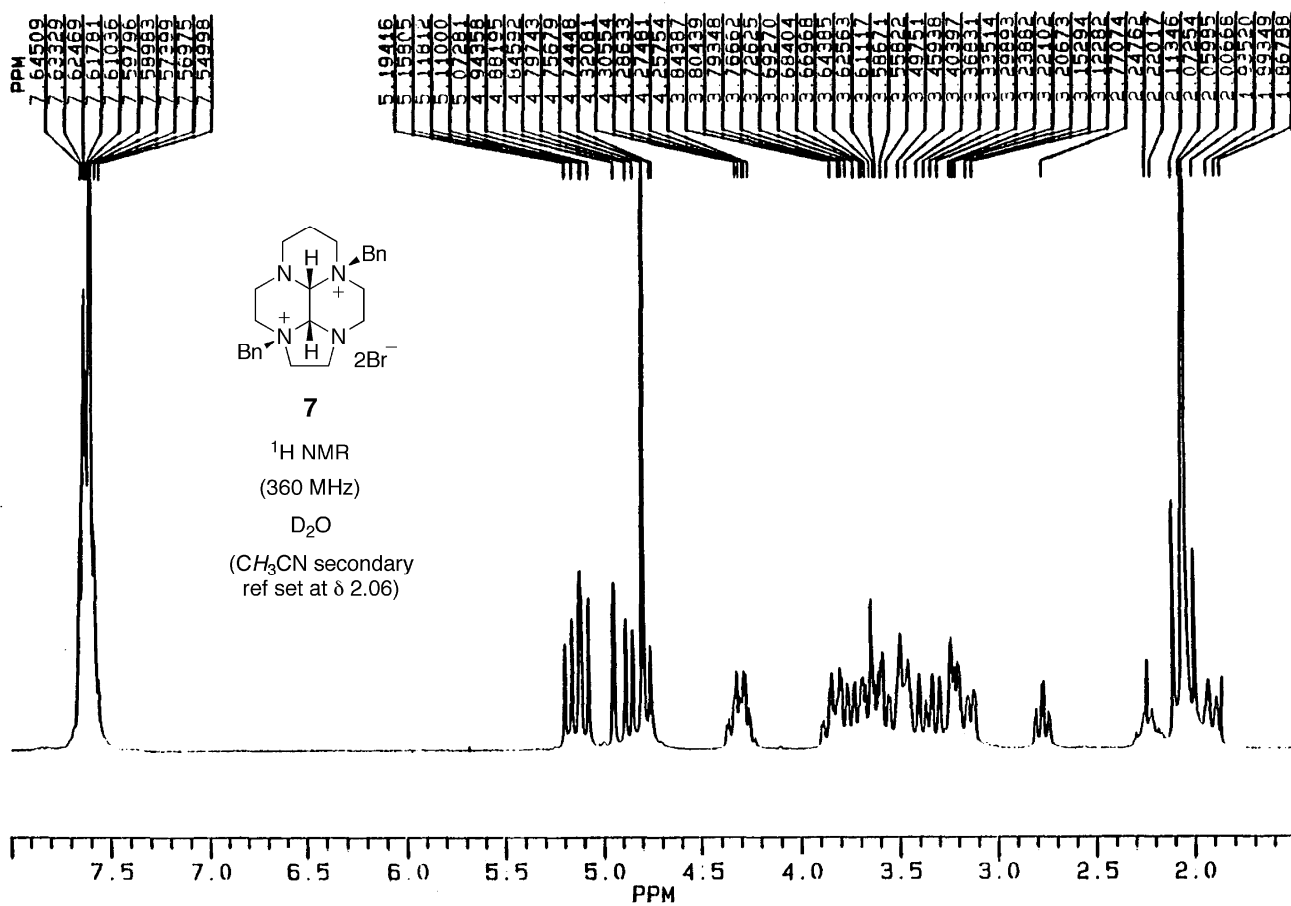

cont. - NMR Spectra of 7

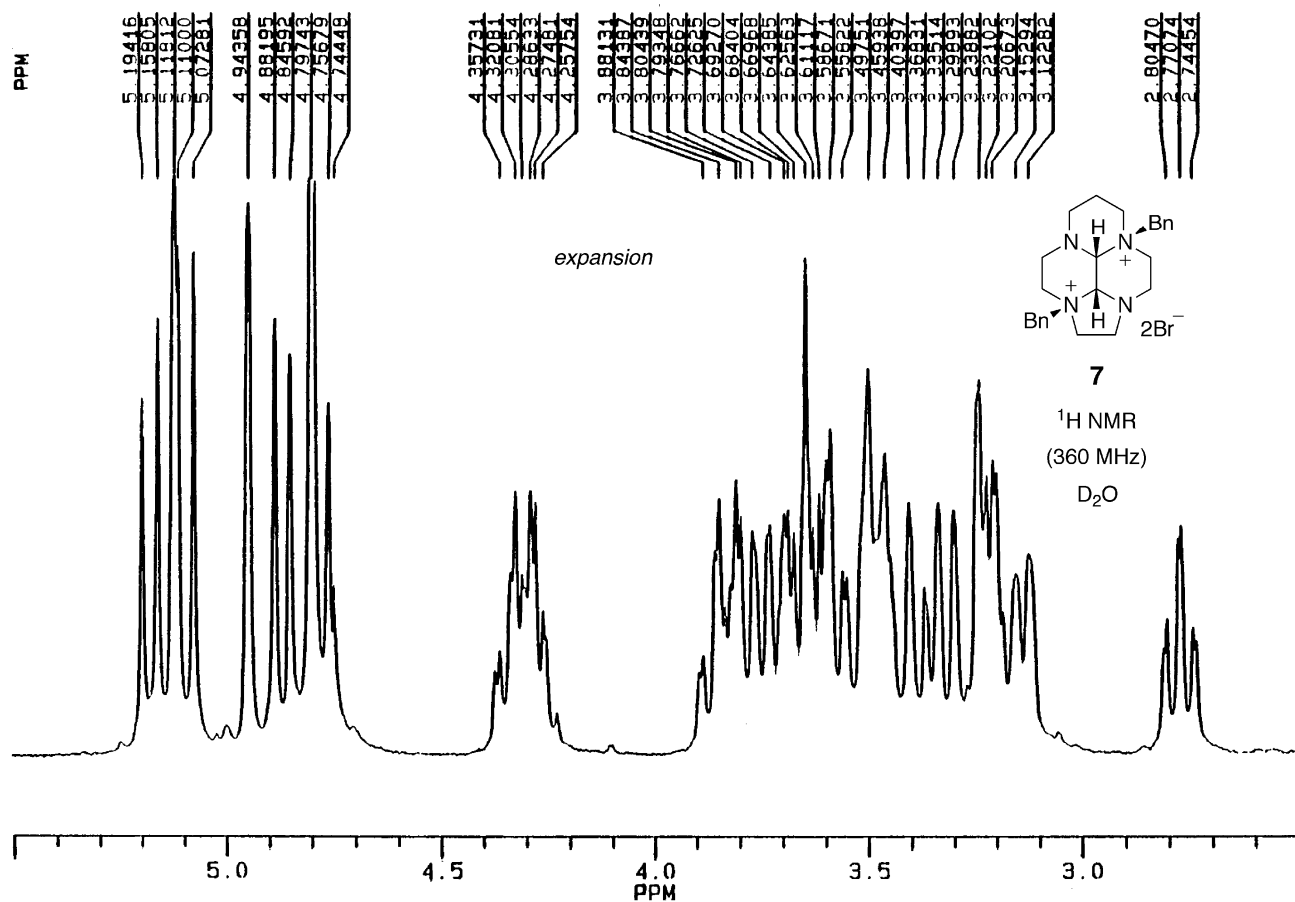

cont. - NMR Spectra of 7

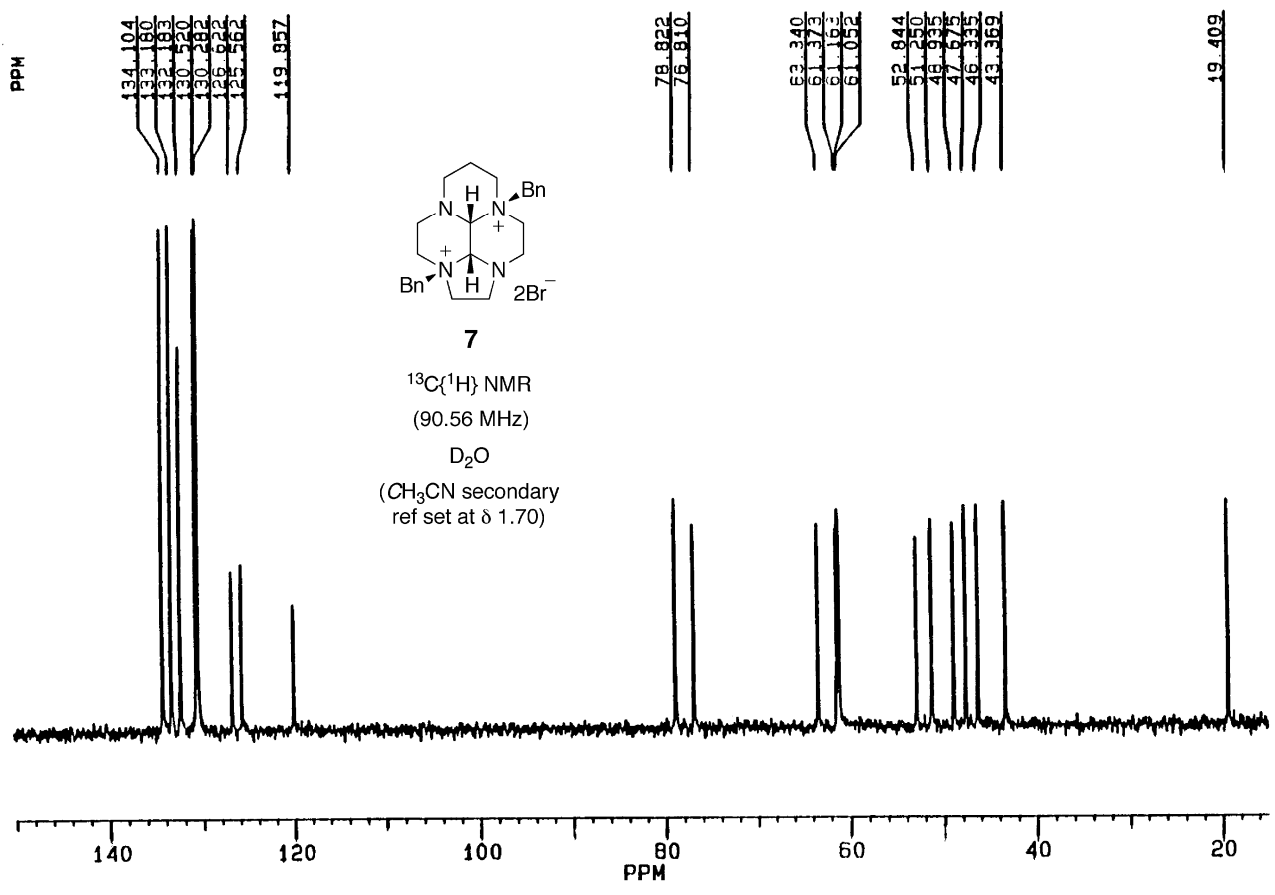

NMR Spectra of **8**

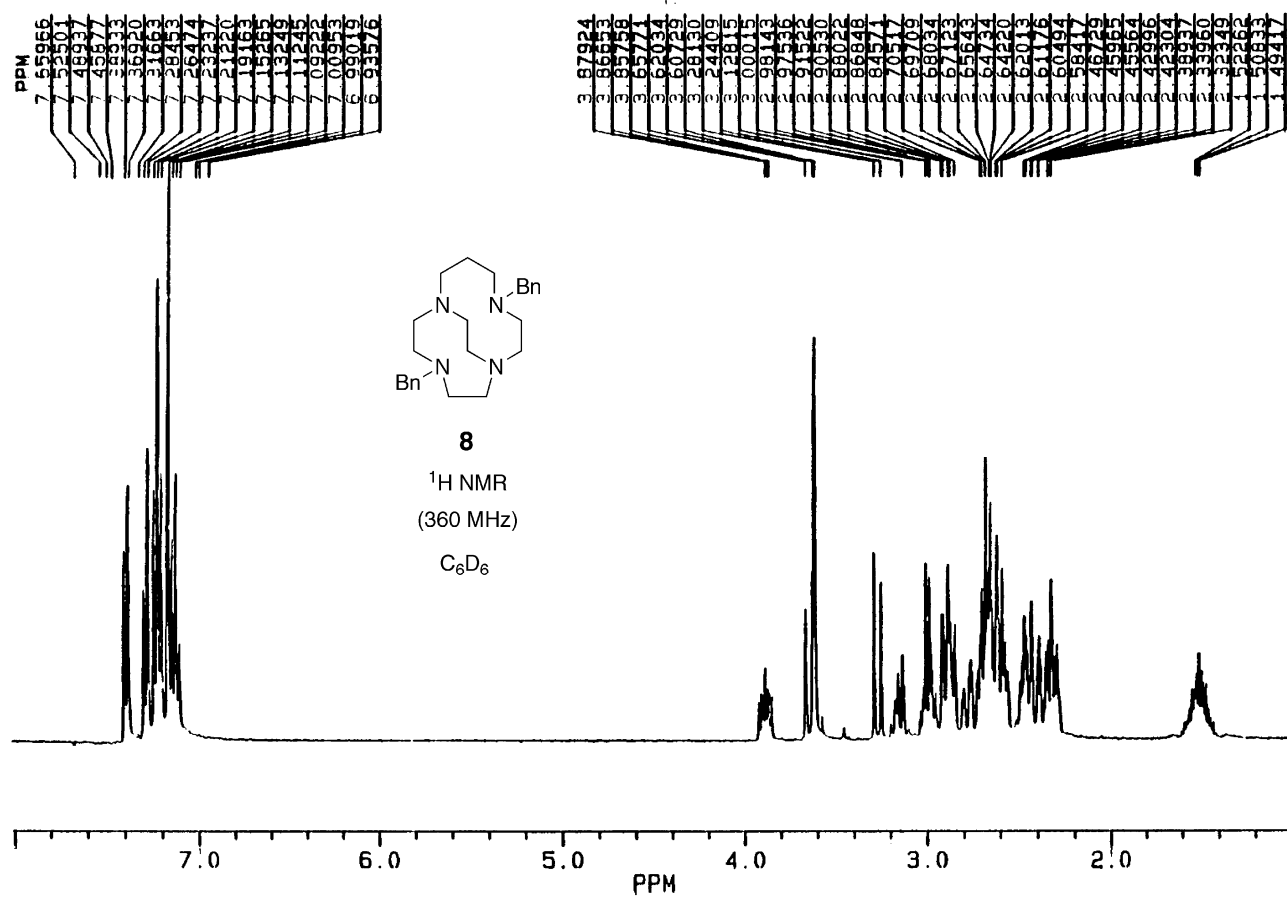

cont. - NMR Spectra of **8**

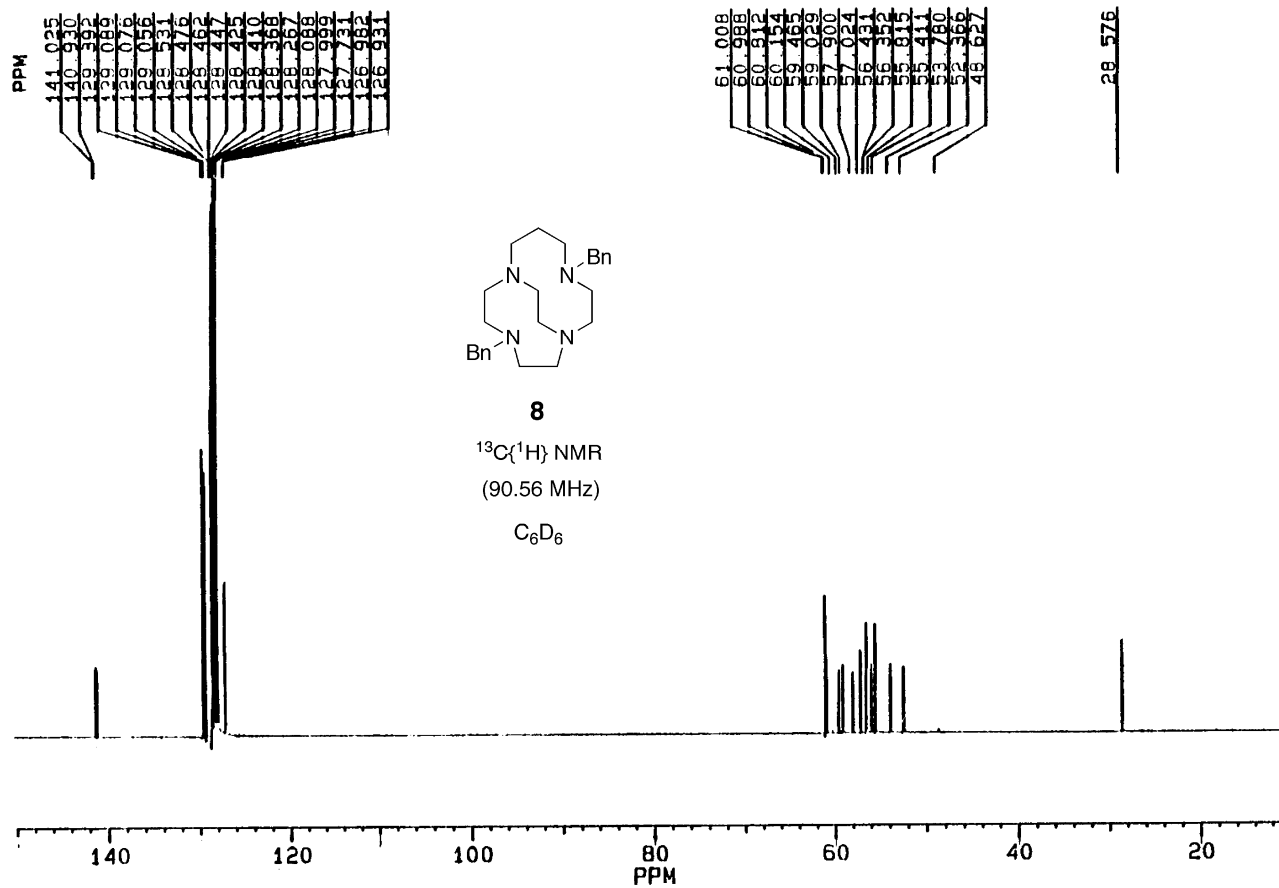

NMR Spectra of **9**

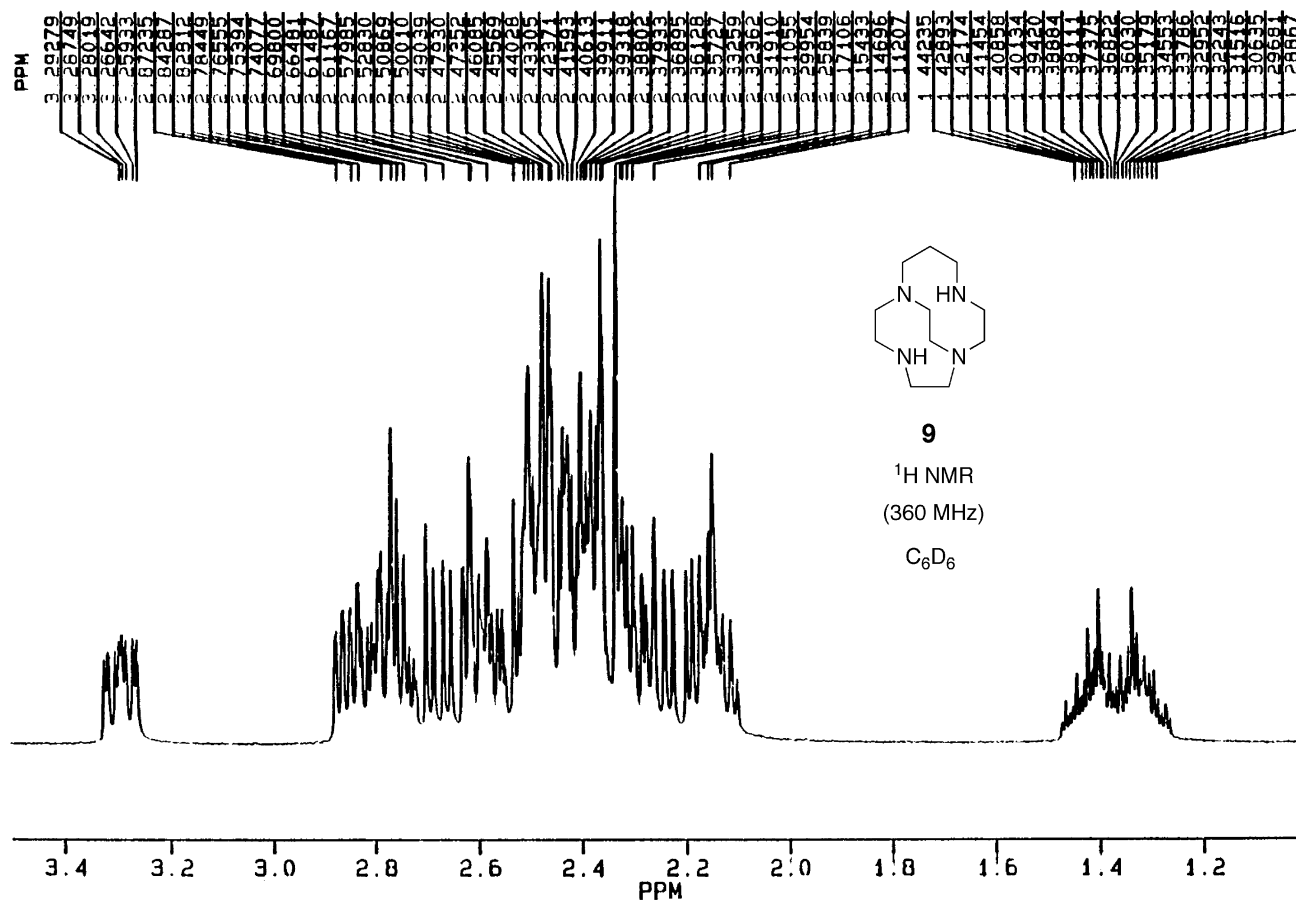

cont. - NMR Spectra of 9

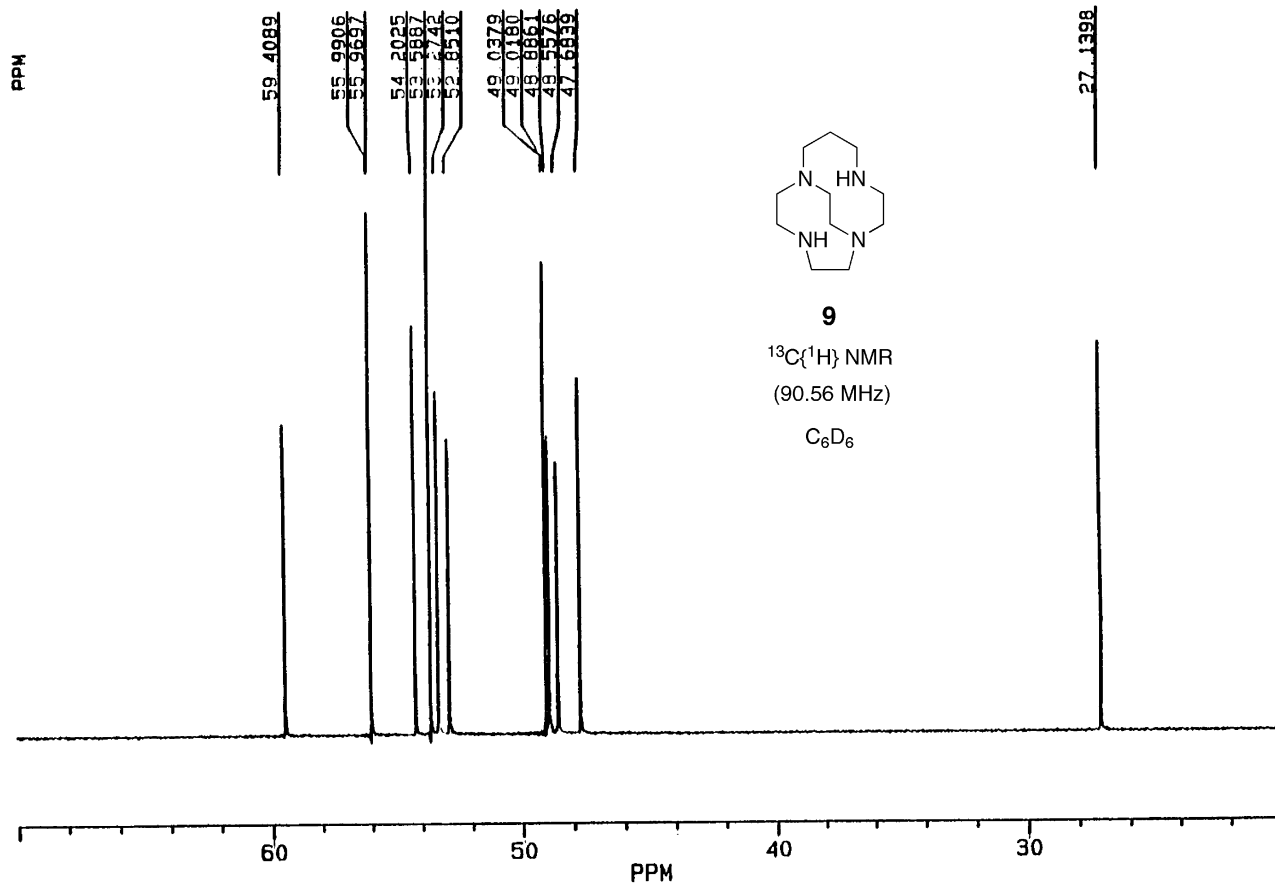



NMR Spectra of 10

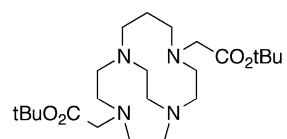

**10**

<sup>1</sup>H NMR  
(500 MHz)  
C<sub>6</sub>D<sub>6</sub>

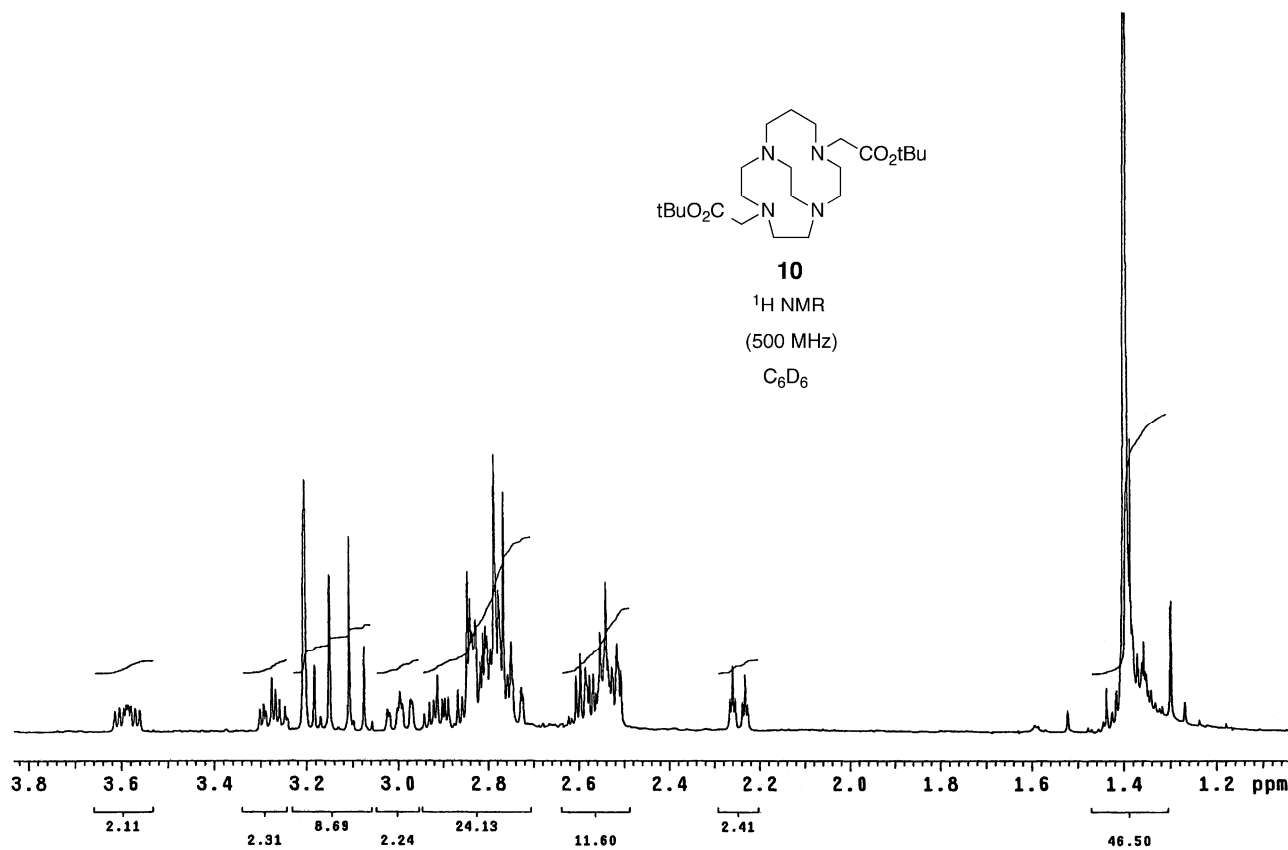

cont.- NMR Spectra of **10**

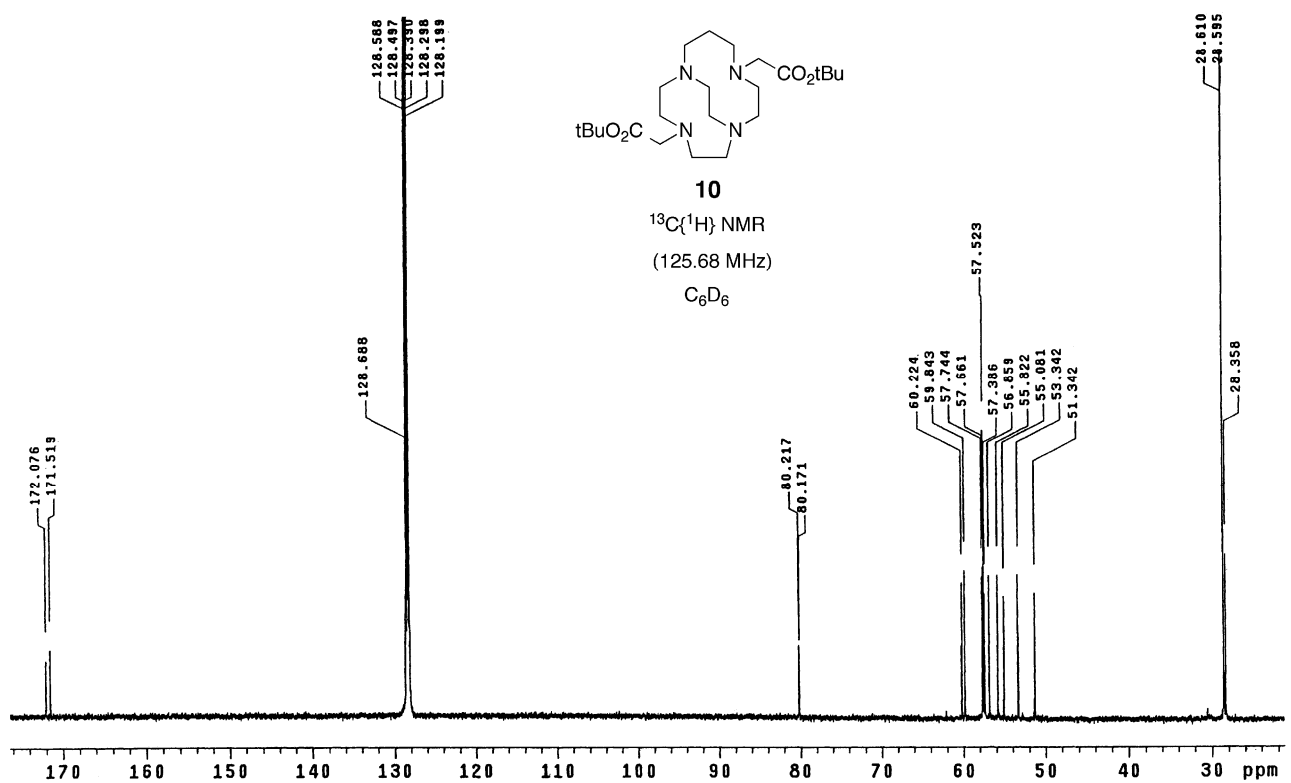

## X-ray Data for C3B-DO2A (11)

Table S1. Crystal data and structure refinement for complex **11**.

|                                   |                                                                                                         |
|-----------------------------------|---------------------------------------------------------------------------------------------------------|
| Identification code               | wong155                                                                                                 |
| Empirical formula                 | C <sub>21</sub> H <sub>30</sub> Cu F <sub>12</sub> N <sub>4</sub> O <sub>6</sub>                        |
| Formula weight                    | 726.03                                                                                                  |
| Temperature                       | 100(2) K                                                                                                |
| Wavelength                        | 1.54178 Å                                                                                               |
| Crystal system                    | Monoclinic                                                                                              |
| Space group                       | P2(1)/n                                                                                                 |
| Unit cell dimensions              | a = 12.2973(7) Å      α = 90°<br>b = 13.3899(8) Å      β = 106.581(3)°<br>c = 17.5444(10) Å     γ = 90° |
| Volume                            | 2768.7(3) Å <sup>3</sup>                                                                                |
| Z                                 | 4                                                                                                       |
| Density (calculated)              | 1.742 g/cm <sup>3</sup>                                                                                 |
| Absorption coefficient            | 2.293 mm <sup>-1</sup>                                                                                  |
| F(000)                            | 1476                                                                                                    |
| Crystal size                      | 0.15 x 0.10 x 0.10 mm <sup>3</sup>                                                                      |
| Theta range for data collection   | 3.92 to 69.53°                                                                                          |
| Index ranges                      | -14 ≤ h ≤ 14, -16 ≤ k ≤ 16, -21 ≤ l ≤ 16                                                                |
| Reflections collected             | 26620                                                                                                   |
| Independent reflections           | 5164 [R(int) = 0.0299]                                                                                  |
| Completeness to theta = 67.00°    | 99.8 %                                                                                                  |
| Max. and min. transmission        | 0.8031 and 0.7249                                                                                       |
| Refinement method                 | Full-matrix least-squares on F <sup>2</sup>                                                             |
| Data / restraints / parameters    | 5164 / 0 / 399                                                                                          |
| Goodness-of-fit on F <sup>2</sup> | 1.036                                                                                                   |
| Final R indices [I > 2σ(I)]       | R1 = 0.0497, wR2 = 0.1253                                                                               |
| R indices (all data)              | R1 = 0.0558, wR2 = 0.1299                                                                               |
| Largest diff. peak and hole       | 1.459 and -0.838 e Å <sup>-3</sup>                                                                      |

Table S2. Atomic coordinates ( $\times 10^4$ ) and equivalent isotropic displacement parameters ( $\text{\AA}^2 \times 10^3$ ) for **11**.  $U(\text{eq})$  is defined as one third of the trace of the orthogonalized  $U^{ij}$  tensor.

|       | x        | y       | z       | $U(\text{eq})$ |
|-------|----------|---------|---------|----------------|
| C(1)  | 718(3)   | 1348(2) | 4843(2) | 27(1)          |
| C(2)  | -258(3)  | 1937(2) | 5009(2) | 27(1)          |
| C(3)  | 2826(3)  | 1284(2) | 5388(2) | 26(1)          |
| C(4)  | 3769(3)  | 1856(2) | 5991(2) | 25(1)          |
| C(5)  | 617(3)   | 3987(2) | 6428(2) | 25(1)          |
| C(6)  | -374(3)  | 3377(2) | 5901(2) | 28(1)          |
| C(7)  | 2717(3)  | 4044(2) | 6842(2) | 25(1)          |
| C(8)  | 3719(3)  | 3350(2) | 6853(2) | 25(1)          |
| C(9)  | 1889(3)  | 2713(3) | 4561(2) | 29(1)          |
| C(10) | 2300(4)  | 3711(3) | 4936(2) | 41(1)          |
| C(11) | 1630(3)  | 4198(2) | 5421(2) | 31(1)          |
| C(12) | -439(3)  | 1630(2) | 6358(2) | 26(1)          |
| C(13) | 371(3)   | 746(2)  | 6617(2) | 23(1)          |
| C(14) | 3741(3)  | 1640(2) | 7377(2) | 23(1)          |
| C(15) | 3070(3)  | 1836(2) | 7976(2) | 22(1)          |
| C(16) | 305(3)   | 1340(3) | 9262(2) | 34(1)          |
| C(17) | 1176(3)  | 2126(3) | 9222(2) | 27(1)          |
| C(18) | 996(3)   | 3099(3) | 9621(2) | 37(1)          |
| C(19) | -2763(3) | 3631(4) | 7236(4) | 65(2)          |
| C(20) | -2788(3) | 4643(3) | 7611(2) | 27(1)          |
| C(21) | -1734(3) | 5249(3) | 7666(2) | 42(1)          |
| N(1)  | 1794(2)  | 1907(2) | 5115(2) | 23(1)          |
| N(2)  | -21(2)   | 2317(2) | 5847(2) | 22(1)          |
| N(3)  | 3376(2)  | 2275(2) | 6661(2) | 21(1)          |
| N(4)  | 1675(2)  | 3756(2) | 6212(2) | 21(1)          |
| O(1)  | 1371(2)  | 858(2)  | 6579(1) | 24(1)          |
| O(2)  | 3(2)     | -19(2)  | 6863(1) | 28(1)          |
| O(3)  | 2188(2)  | 2347(2) | 7765(1) | 27(1)          |
| O(4)  | 3480(2)  | 1435(2) | 8639(1) | 24(1)          |
| O(5)  | 2248(2)  | 1778(2) | 9598(1) | 32(1)          |
| O(6)  | -2884(2) | 4520(2) | 8367(2) | 44(1)          |
| Cu(1) | 1667(1)  | 2267(1) | 6311(1) | 18(1)          |

|       |          |         |          |        |
|-------|----------|---------|----------|--------|
| F(1)  | 252(2)   | 1164(2) | 9995(2)  | 47(1)  |
| F(2)  | 555(2)   | 475(2)  | 8972(2)  | 54(1)  |
| F(3)  | -743(2)  | 1578(2) | 8831(2)  | 54(1)  |
| F(4)  | 1260(2)  | 3021(2) | 10408(2) | 51(1)  |
| F(5)  | 1654(3)  | 3803(2) | 9456(2)  | 69(1)  |
| F(6)  | -69(2)   | 3420(2) | 9373(2)  | 53(1)  |
| F(7)  | -2796(3) | 3720(4) | 6479(2)  | 129(2) |
| F(8)  | -3657(2) | 3111(2) | 7275(3)  | 124(2) |
| F(9)  | -1844(2) | 3102(2) | 7586(2)  | 77(1)  |
| F(10) | -1548(3) | 5350(4) | 6959(2)  | 112(2) |
| F(11) | -1838(3) | 6139(2) | 7937(3)  | 104(2) |
| F(12) | -797(2)  | 4865(2) | 8130(2)  | 55(1)  |

---

Table S3. Bond lengths [Å] and angles [°] for **11**.

---

|              |          |
|--------------|----------|
| C(1)-N(1)    | 1.476(4) |
| C(1)-C(2)    | 1.532(5) |
| C(1)-H(1A)   | 0.9900   |
| C(1)-H(1B)   | 0.9900   |
| C(2)-N(2)    | 1.502(4) |
| C(2)-H(2A)   | 0.9900   |
| C(2)-H(2B)   | 0.9900   |
| C(3)-N(1)    | 1.480(4) |
| C(3)-C(4)    | 1.534(5) |
| C(3)-H(3A)   | 0.9900   |
| C(3)-H(3B)   | 0.9900   |
| C(4)-N(3)    | 1.501(4) |
| C(4)-H(4A)   | 0.9900   |
| C(4)-H(4B)   | 0.9900   |
| C(5)-N(4)    | 1.488(4) |
| C(5)-C(6)    | 1.537(4) |
| C(5)-H(5A)   | 0.9900   |
| C(5)-H(5B)   | 0.9900   |
| C(6)-N(2)    | 1.496(4) |
| C(6)-H(6A)   | 0.9900   |
| C(6)-H(6B)   | 0.9900   |
| C(7)-N(4)    | 1.484(4) |
| C(7)-C(8)    | 1.539(4) |
| C(7)-H(7A)   | 0.9900   |
| C(7)-H(7B)   | 0.9900   |
| C(8)-N(3)    | 1.511(4) |
| C(8)-H(8A)   | 0.9900   |
| C(8)-H(8B)   | 0.9900   |
| C(9)-N(1)    | 1.479(4) |
| C(9)-C(10)   | 1.511(5) |
| C(9)-H(9A)   | 0.9900   |
| C(9)-H(9B)   | 0.9900   |
| C(10)-C(11)  | 1.494(5) |
| C(10)-H(10A) | 0.9900   |
| C(10)-H(10B) | 0.9900   |

|              |          |
|--------------|----------|
| C(11)-N(4)   | 1.494(4) |
| C(11)-H(11A) | 0.9900   |
| C(11)-H(11B) | 0.9900   |
| C(12)-N(2)   | 1.476(4) |
| C(12)-C(13)  | 1.530(4) |
| C(12)-H(12A) | 0.9900   |
| C(12)-H(12B) | 0.9900   |
| C(13)-O(2)   | 1.245(4) |
| C(13)-O(1)   | 1.259(4) |
| C(14)-N(3)   | 1.477(4) |
| C(14)-C(15)  | 1.532(4) |
| C(14)-H(14A) | 0.9900   |
| C(14)-H(14B) | 0.9900   |
| C(15)-O(3)   | 1.247(4) |
| C(15)-O(4)   | 1.248(4) |
| C(16)-F(1)   | 1.328(4) |
| C(16)-F(3)   | 1.334(4) |
| C(16)-F(2)   | 1.336(4) |
| C(16)-C(17)  | 1.517(5) |
| C(17)-O(5)   | 1.376(4) |
| C(17)-C(18)  | 1.525(5) |
| C(17)-H(17)  | 1.0000   |
| C(18)-F(4)   | 1.328(5) |
| C(18)-F(5)   | 1.328(4) |
| C(18)-F(6)   | 1.328(4) |
| C(19)-F(8)   | 1.319(6) |
| C(19)-F(7)   | 1.323(7) |
| C(19)-F(9)   | 1.327(6) |
| C(19)-C(20)  | 1.510(5) |
| C(20)-O(6)   | 1.375(4) |
| C(20)-C(21)  | 1.509(5) |
| C(20)-H(20)  | 1.0000   |
| C(21)-F(11)  | 1.303(5) |
| C(21)-F(12)  | 1.312(4) |
| C(21)-F(10)  | 1.331(5) |
| N(1)-Cu(1)   | 2.201(3) |
| N(2)-Cu(1)   | 2.003(3) |

|                  |          |
|------------------|----------|
| N(3)-Cu(1)       | 2.014(3) |
| N(4)-Cu(1)       | 2.002(3) |
| O(1)-Cu(1)       | 2.003(2) |
| O(5)-H(5)        | 0.8400   |
| O(6)-H(6)        | 0.8400   |
|                  |          |
| N(1)-C(1)-C(2)   | 110.8(3) |
| N(1)-C(1)-H(1A)  | 109.5    |
| C(2)-C(1)-H(1A)  | 109.5    |
| N(1)-C(1)-H(1B)  | 109.5    |
| C(2)-C(1)-H(1B)  | 109.5    |
| H(1A)-C(1)-H(1B) | 108.1    |
| N(2)-C(2)-C(1)   | 114.6(3) |
| N(2)-C(2)-H(2A)  | 108.6    |
| C(1)-C(2)-H(2A)  | 108.6    |
| N(2)-C(2)-H(2B)  | 108.6    |
| C(1)-C(2)-H(2B)  | 108.6    |
| H(2A)-C(2)-H(2B) | 107.6    |
| N(1)-C(3)-C(4)   | 110.5(3) |
| N(1)-C(3)-H(3A)  | 109.5    |
| C(4)-C(3)-H(3A)  | 109.5    |
| N(1)-C(3)-H(3B)  | 109.5    |
| C(4)-C(3)-H(3B)  | 109.5    |
| H(3A)-C(3)-H(3B) | 108.1    |
| N(3)-C(4)-C(3)   | 112.2(2) |
| N(3)-C(4)-H(4A)  | 109.2    |
| C(3)-C(4)-H(4A)  | 109.2    |
| N(3)-C(4)-H(4B)  | 109.2    |
| C(3)-C(4)-H(4B)  | 109.2    |
| H(4A)-C(4)-H(4B) | 107.9    |
| N(4)-C(5)-C(6)   | 109.7(3) |
| N(4)-C(5)-H(5A)  | 109.7    |
| C(6)-C(5)-H(5A)  | 109.7    |
| N(4)-C(5)-H(5B)  | 109.7    |
| C(6)-C(5)-H(5B)  | 109.7    |
| H(5A)-C(5)-H(5B) | 108.2    |
| N(2)-C(6)-C(5)   | 110.3(2) |



|                     |          |
|---------------------|----------|
| N(2)-C(6)-H(6A)     | 109.6    |
| C(5)-C(6)-H(6A)     | 109.6    |
| N(2)-C(6)-H(6B)     | 109.6    |
| C(5)-C(6)-H(6B)     | 109.6    |
| H(6A)-C(6)-H(6B)    | 108.1    |
| N(4)-C(7)-C(8)      | 111.8(3) |
| N(4)-C(7)-H(7A)     | 109.3    |
| C(8)-C(7)-H(7A)     | 109.3    |
| N(4)-C(7)-H(7B)     | 109.3    |
| C(8)-C(7)-H(7B)     | 109.3    |
| H(7A)-C(7)-H(7B)    | 107.9    |
| N(3)-C(8)-C(7)      | 113.6(2) |
| N(3)-C(8)-H(8A)     | 108.8    |
| C(7)-C(8)-H(8A)     | 108.8    |
| N(3)-C(8)-H(8B)     | 108.8    |
| C(7)-C(8)-H(8B)     | 108.8    |
| H(8A)-C(8)-H(8B)    | 107.7    |
| N(1)-C(9)-C(10)     | 116.0(3) |
| N(1)-C(9)-H(9A)     | 108.3    |
| C(10)-C(9)-H(9A)    | 108.3    |
| N(1)-C(9)-H(9B)     | 108.3    |
| C(10)-C(9)-H(9B)    | 108.3    |
| H(9A)-C(9)-H(9B)    | 107.4    |
| C(11)-C(10)-C(9)    | 117.7(3) |
| C(11)-C(10)-H(10A)  | 107.9    |
| C(9)-C(10)-H(10A)   | 107.9    |
| C(11)-C(10)-H(10B)  | 107.9    |
| C(9)-C(10)-H(10B)   | 107.9    |
| H(10A)-C(10)-H(10B) | 107.2    |
| N(4)-C(11)-C(10)    | 118.4(3) |
| N(4)-C(11)-H(11A)   | 107.7    |
| C(10)-C(11)-H(11A)  | 107.7    |
| N(4)-C(11)-H(11B)   | 107.7    |
| C(10)-C(11)-H(11B)  | 107.7    |
| H(11A)-C(11)-H(11B) | 107.1    |
| N(2)-C(12)-C(13)    | 110.7(2) |
| N(2)-C(12)-H(12A)   | 109.5    |

|                     |          |
|---------------------|----------|
| C(13)-C(12)-H(12A)  | 109.5    |
| N(2)-C(12)-H(12B)   | 109.5    |
| C(13)-C(12)-H(12B)  | 109.5    |
| H(12A)-C(12)-H(12B) | 108.1    |
| O(2)-C(13)-O(1)     | 125.0(3) |
| O(2)-C(13)-C(12)    | 118.0(3) |
| O(1)-C(13)-C(12)    | 117.0(3) |
| N(3)-C(14)-C(15)    | 113.1(2) |
| N(3)-C(14)-H(14A)   | 109.0    |
| C(15)-C(14)-H(14A)  | 109.0    |
| N(3)-C(14)-H(14B)   | 109.0    |
| C(15)-C(14)-H(14B)  | 109.0    |
| H(14A)-C(14)-H(14B) | 107.8    |
| O(3)-C(15)-O(4)     | 126.8(3) |
| O(3)-C(15)-C(14)    | 118.9(3) |
| O(4)-C(15)-C(14)    | 114.3(3) |
| F(1)-C(16)-F(3)     | 106.6(3) |
| F(1)-C(16)-F(2)     | 107.2(3) |
| F(3)-C(16)-F(2)     | 106.3(3) |
| F(1)-C(16)-C(17)    | 113.5(3) |
| F(3)-C(16)-C(17)    | 112.9(3) |
| F(2)-C(16)-C(17)    | 110.0(3) |
| O(5)-C(17)-C(16)    | 109.6(3) |
| O(5)-C(17)-C(18)    | 108.3(3) |
| C(16)-C(17)-C(18)   | 112.0(3) |
| O(5)-C(17)-H(17)    | 109.0    |
| C(16)-C(17)-H(17)   | 109.0    |
| C(18)-C(17)-H(17)   | 109.0    |
| F(4)-C(18)-F(5)     | 107.4(3) |
| F(4)-C(18)-F(6)     | 107.0(3) |
| F(5)-C(18)-F(6)     | 107.7(3) |
| F(4)-C(18)-C(17)    | 112.7(3) |
| F(5)-C(18)-C(17)    | 109.2(3) |
| F(6)-C(18)-C(17)    | 112.6(3) |
| F(8)-C(19)-F(7)     | 108.2(4) |
| F(8)-C(19)-F(9)     | 107.9(5) |
| F(7)-C(19)-F(9)     | 106.9(4) |

|                   |            |
|-------------------|------------|
| F(8)-C(19)-C(20)  | 109.3(3)   |
| F(7)-C(19)-C(20)  | 110.9(5)   |
| F(9)-C(19)-C(20)  | 113.5(4)   |
| O(6)-C(20)-C(21)  | 108.1(3)   |
| O(6)-C(20)-C(19)  | 109.3(4)   |
| C(21)-C(20)-C(19) | 112.8(3)   |
| O(6)-C(20)-H(20)  | 108.9      |
| C(21)-C(20)-H(20) | 108.9      |
| C(19)-C(20)-H(20) | 108.9      |
| F(11)-C(21)-F(12) | 107.0(4)   |
| F(11)-C(21)-F(10) | 107.9(4)   |
| F(12)-C(21)-F(10) | 105.3(4)   |
| F(11)-C(21)-C(20) | 110.1(4)   |
| F(12)-C(21)-C(20) | 114.6(3)   |
| F(10)-C(21)-C(20) | 111.5(3)   |
| C(1)-N(1)-C(9)    | 112.9(3)   |
| C(1)-N(1)-C(3)    | 115.1(3)   |
| C(9)-N(1)-C(3)    | 113.8(3)   |
| C(1)-N(1)-Cu(1)   | 96.78(18)  |
| C(9)-N(1)-Cu(1)   | 120.5(2)   |
| C(3)-N(1)-Cu(1)   | 95.92(18)  |
| C(12)-N(2)-C(6)   | 113.3(3)   |
| C(12)-N(2)-C(2)   | 112.3(2)   |
| C(6)-N(2)-C(2)    | 113.9(2)   |
| C(12)-N(2)-Cu(1)  | 103.41(18) |
| C(6)-N(2)-Cu(1)   | 106.95(18) |
| C(2)-N(2)-Cu(1)   | 106.03(19) |
| C(14)-N(3)-C(4)   | 111.3(2)   |
| C(14)-N(3)-C(8)   | 111.2(2)   |
| C(4)-N(3)-C(8)    | 113.5(2)   |
| C(14)-N(3)-Cu(1)  | 107.10(18) |
| C(4)-N(3)-Cu(1)   | 107.47(18) |
| C(8)-N(3)-Cu(1)   | 105.88(18) |
| C(7)-N(4)-C(5)    | 112.8(2)   |
| C(7)-N(4)-C(11)   | 112.6(3)   |
| C(5)-N(4)-C(11)   | 110.5(2)   |
| C(7)-N(4)-Cu(1)   | 102.58(18) |

|                  |            |
|------------------|------------|
| C(5)-N(4)-Cu(1)  | 99.09(18)  |
| C(11)-N(4)-Cu(1) | 118.4(2)   |
| C(13)-O(1)-Cu(1) | 111.72(19) |
| C(17)-O(5)-H(5)  | 109.5      |
| C(20)-O(6)-H(6)  | 109.5      |
| N(4)-Cu(1)-N(2)  | 87.81(10)  |
| N(4)-Cu(1)-O(1)  | 164.72(10) |
| N(2)-Cu(1)-O(1)  | 83.69(10)  |
| N(4)-Cu(1)-N(3)  | 89.47(10)  |
| N(2)-Cu(1)-N(3)  | 173.64(11) |
| O(1)-Cu(1)-N(3)  | 100.19(9)  |
| N(4)-Cu(1)-N(1)  | 97.56(10)  |
| N(2)-Cu(1)-N(1)  | 88.08(10)  |
| O(1)-Cu(1)-N(1)  | 94.83(9)   |
| N(3)-Cu(1)-N(1)  | 86.57(10)  |

---

Symmetry transformations used to generate equivalent atoms:

Table S4. Anisotropic displacement parameters ( $\text{\AA}^2 \times 10^3$ ) for **11**. The anisotropic displacement factor exponent takes the form:  
 $-2\pi^2 [h^2 a^{*2} U^{11} + \dots + 2 h k a^* b^* U^{12}]$

|       | U <sup>11</sup> | U <sup>22</sup> | U <sup>33</sup> | U <sup>23</sup> | U <sup>13</sup> | U <sup>12</sup> |
|-------|-----------------|-----------------|-----------------|-----------------|-----------------|-----------------|
| C(1)  | 32(2)           | 23(2)           | 23(2)           | -4(1)           | 5(1)            | -2(1)           |
| C(2)  | 25(2)           | 27(2)           | 25(2)           | -2(1)           | 2(1)            | -1(1)           |
| C(3)  | 32(2)           | 23(2)           | 27(2)           | -2(1)           | 14(1)           | 6(1)            |
| C(4)  | 23(2)           | 29(2)           | 26(2)           | 2(1)            | 13(1)           | 6(1)            |
| C(5)  | 25(2)           | 20(2)           | 29(2)           | -1(1)           | 7(1)            | 4(1)            |
| C(6)  | 22(2)           | 19(2)           | 39(2)           | -1(1)           | 5(1)            | 4(1)            |
| C(7)  | 23(2)           | 21(2)           | 30(2)           | -3(1)           | 5(1)            | -2(1)           |
| C(8)  | 21(2)           | 21(2)           | 31(2)           | 0(1)            | 7(1)            | -2(1)           |
| C(9)  | 37(2)           | 30(2)           | 22(2)           | 3(1)            | 11(1)           | 2(1)            |
| C(10) | 50(2)           | 39(2)           | 37(2)           | 8(2)            | 15(2)           | 2(2)            |
| C(11) | 43(2)           | 22(2)           | 30(2)           | 7(1)            | 13(2)           | 3(1)            |
| C(12) | 22(2)           | 28(2)           | 31(2)           | 1(1)            | 9(1)            | -1(1)           |
| C(13) | 25(2)           | 24(2)           | 21(2)           | -2(1)           | 7(1)            | -3(1)           |
| C(14) | 22(1)           | 21(2)           | 25(2)           | 2(1)            | 5(1)            | 3(1)            |
| C(15) | 23(2)           | 19(1)           | 23(2)           | -2(1)           | 6(1)            | -3(1)           |
| C(16) | 30(2)           | 34(2)           | 40(2)           | -7(2)           | 13(2)           | -1(1)           |
| C(17) | 23(2)           | 36(2)           | 23(2)           | 4(1)            | 8(1)            | 3(1)            |
| C(18) | 36(2)           | 31(2)           | 48(2)           | 4(2)            | 18(2)           | -1(2)           |
| C(19) | 20(2)           | 68(3)           | 103(4)          | -53(3)          | 14(2)           | -2(2)           |
| C(20) | 27(2)           | 29(2)           | 27(2)           | 0(1)            | 9(1)            | 4(1)            |
| C(21) | 42(2)           | 38(2)           | 39(2)           | 12(2)           | 4(2)            | -5(2)           |
| N(1)  | 26(1)           | 23(1)           | 22(1)           | 0(1)            | 8(1)            | 2(1)            |
| N(2)  | 21(1)           | 19(1)           | 24(1)           | 1(1)            | 5(1)            | 1(1)            |
| N(3)  | 21(1)           | 21(1)           | 23(1)           | 1(1)            | 9(1)            | 2(1)            |
| N(4)  | 23(1)           | 18(1)           | 22(1)           | 0(1)            | 6(1)            | 1(1)            |
| O(1)  | 24(1)           | 20(1)           | 28(1)           | 4(1)            | 8(1)            | 1(1)            |
| O(2)  | 31(1)           | 25(1)           | 30(1)           | 4(1)            | 11(1)           | -6(1)           |
| O(3)  | 26(1)           | 29(1)           | 27(1)           | 3(1)            | 10(1)           | 6(1)            |
| O(4)  | 27(1)           | 22(1)           | 21(1)           | 0(1)            | 2(1)            | 2(1)            |
| O(5)  | 26(1)           | 44(1)           | 27(1)           | 6(1)            | 9(1)            | 5(1)            |
| O(6)  | 38(1)           | 65(2)           | 35(1)           | 15(1)           | 19(1)           | 18(1)           |
| Cu(1) | 18(1)           | 16(1)           | 21(1)           | 1(1)            | 6(1)            | 1(1)            |

|       |       |        |        |         |       |        |
|-------|-------|--------|--------|---------|-------|--------|
| F(1)  | 55(1) | 43(1)  | 51(1)  | 4(1)    | 30(1) | -11(1) |
| F(2)  | 56(2) | 39(1)  | 77(2)  | -22(1)  | 32(1) | -7(1)  |
| F(3)  | 26(1) | 66(2)  | 67(2)  | -8(1)   | 6(1)  | -5(1)  |
| F(4)  | 63(2) | 49(1)  | 43(1)  | -14(1)  | 16(1) | 0(1)   |
| F(5)  | 78(2) | 34(1)  | 112(3) | 1(1)    | 54(2) | -16(1) |
| F(6)  | 51(1) | 42(1)  | 71(2)  | 9(1)    | 24(1) | 20(1)  |
| F(7)  | 58(2) | 238(5) | 78(2)  | -111(3) | -4(2) | 30(3)  |
| F(8)  | 35(2) | 55(2)  | 283(6) | -76(3)  | 48(2) | -17(1) |
| F(9)  | 34(1) | 43(2)  | 154(3) | -37(2)  | 26(2) | 5(1)   |
| F(10) | 66(2) | 213(5) | 56(2)  | 58(2)   | 14(2) | -43(3) |
| F(11) | 78(2) | 29(2)  | 184(4) | -10(2)  | 5(2)  | -10(1) |
| F(12) | 33(1) | 55(2)  | 66(2)  | 11(1)   | -2(1) | -12(1) |

---

Table S5. Hydrogen coordinates ( $\times 10^4$ ) and isotropic displacement parameters ( $\text{\AA}^2 \times 10^{-3}$ ) for **11**.

|        | x     | y    | z    | U(eq) |
|--------|-------|------|------|-------|
| H(1A)  | 798   | 697  | 5122 | 32    |
| H(1B)  | 543   | 1216 | 4266 | 32    |
| H(2A)  | -438  | 2514 | 4641 | 33    |
| H(2B)  | -938  | 1504 | 4891 | 33    |
| H(3A)  | 3091  | 1091 | 4926 | 31    |
| H(3B)  | 2645  | 665  | 5636 | 31    |
| H(4A)  | 4417  | 1401 | 6211 | 30    |
| H(4B)  | 4036  | 2409 | 5716 | 30    |
| H(5A)  | 446   | 4709 | 6353 | 30    |
| H(5B)  | 721   | 3821 | 6994 | 30    |
| H(6A)  | -1024 | 3399 | 6128 | 33    |
| H(6B)  | -620  | 3674 | 5362 | 33    |
| H(7A)  | 2564  | 4016 | 7366 | 30    |
| H(7B)  | 2922  | 4740 | 6752 | 30    |
| H(8A)  | 4099  | 3599 | 6463 | 30    |
| H(8B)  | 4276  | 3380 | 7386 | 30    |
| H(9A)  | 1134  | 2811 | 4173 | 35    |
| H(9B)  | 2413  | 2488 | 4260 | 35    |
| H(10A) | 3087  | 3623 | 5279 | 49    |
| H(10B) | 2331  | 4178 | 4505 | 49    |
| H(11A) | 1885  | 4901 | 5510 | 37    |
| H(11B) | 826   | 4211 | 5098 | 37    |
| H(12A) | -1201 | 1381 | 6064 | 32    |
| H(12B) | -506  | 1993 | 6834 | 32    |
| H(14A) | 4557  | 1760 | 7640 | 27    |
| H(14B) | 3651  | 930  | 7214 | 27    |
| H(17)  | 1119  | 2263 | 8652 | 33    |
| H(20)  | -3463 | 5021 | 7286 | 33    |
| H(5)   | 2602  | 1679 | 9260 | 48    |
| H(6)   | -3537 | 4691 | 8377 | 66    |

## X-ray Data for Cu-CB-TR2A (12)

Table S6. Crystal data and structure refinement for **12**.

|                                   |                                                                                                                 |
|-----------------------------------|-----------------------------------------------------------------------------------------------------------------|
| Identification code               | wong157                                                                                                         |
| Empirical formula                 | C <sub>45</sub> H <sub>78</sub> Cl <sub>3</sub> Cu <sub>3</sub> N <sub>12</sub> Na <sub>3</sub> O <sub>27</sub> |
| Formula weight                    | 1585.13                                                                                                         |
| Temperature                       | 173(2) K                                                                                                        |
| Wavelength                        | 0.71073 Å                                                                                                       |
| Crystal system                    | Monoclinic                                                                                                      |
| Space group                       | P2(1)/c                                                                                                         |
| Unit cell dimensions              | a = 20.2068(19) Å      α = 90°.<br>b = 24.613(2) Å      β = 105.8090(10)°.<br>c = 13.0914(12) Å      γ = 90°.   |
| Volume                            | 6264.6(10) Å <sup>3</sup>                                                                                       |
| Z                                 | 4                                                                                                               |
| Density (calculated)              | 1.681 Mg/m <sup>3</sup>                                                                                         |
| Absorption coefficient            | 1.252 mm <sup>-1</sup>                                                                                          |
| F(000)                            | 3276                                                                                                            |
| Crystal size                      | 0.40 x 0.15 x 0.05 mm <sup>3</sup>                                                                              |
| Theta range for data collection   | 1.33 to 27.82°.                                                                                                 |
| Index ranges                      | -25 ≤ h ≤ 26, -26 ≤ k ≤ 31, -16 ≤ l ≤ 17                                                                        |
| Reflections collected             | 37892                                                                                                           |
| Independent reflections           | 13599 [R(int) = 0.0675]                                                                                         |
| Completeness to theta = 25.00°    | 98.8 %                                                                                                          |
| Absorption correction             | multi-scan/sadabs                                                                                               |
| Max. and min. transmission        | 0.9401 and 0.6344                                                                                               |
| Refinement method                 | Full-matrix least-squares on F <sup>2</sup>                                                                     |
| Data / restraints / parameters    | 13599 / 44 / 797                                                                                                |
| Goodness-of-fit on F <sup>2</sup> | 1.044                                                                                                           |
| Final R indices [I > 2σ(I)]       | R1 = 0.0784, wR2 = 0.1711                                                                                       |
| R indices (all data)              | R1 = 0.1396, wR2 = 0.2027                                                                                       |
| Largest diff. peak and hole       | 1.332 and -1.200 e.Å <sup>-3</sup>                                                                              |



Table S7. Atomic coordinates ( $\times 10^4$ ) and equivalent isotropic displacement parameters ( $\text{\AA}^2 \times 10^3$ ) for **12**.  $U(\text{eq})$  is defined as one third of the trace of the orthogonalized  $U^{ij}$  tensor.

|        | x        | y       | z        | $U(\text{eq})$ |
|--------|----------|---------|----------|----------------|
| Cu(1)  | 4946(1)  | 1542(1) | -1621(1) | 19(1)          |
| Cu(2)  | 2141(1)  | -38(1)  | 4979(1)  | 19(1)          |
| Cu(3)  | 56(1)    | 1717(1) | 310(1)   | 40(1)          |
| Cl(1)  | 4716(1)  | 1020(1) | 3373(1)  | 26(1)          |
| Cl(3)  | 7502(1)  | 2399(1) | 2126(2)  | 46(1)          |
| Cl(2)  | 2558(1)  | 86(1)   | -190(2)  | 44(1)          |
| Na(1)  | 2743(1)  | 2472(1) | 94(2)    | 26(1)          |
| Na(2)  | 3075(1)  | 1205(1) | 1397(2)  | 26(1)          |
| Na(3)  | 2218(1)  | 2085(1) | 2688(2)  | 27(1)          |
| O(1)   | 3564(2)  | 1743(2) | 340(4)   | 24(1)          |
| O(2)   | 4308(2)  | 2042(2) | -521(3)  | 22(1)          |
| O(3)   | 3993(2)  | 1447(2) | -2529(4) | 24(1)          |
| O(4)   | 3157(2)  | 2004(2) | -3409(4) | 39(1)          |
| O(5)   | 2541(2)  | 1140(2) | 2753(4)  | 29(1)          |
| O(6)   | 2179(2)  | 874(2)  | 4132(3)  | 24(1)          |
| O(7)   | 1315(2)  | -186(2) | 3819(4)  | 27(1)          |
| O(8)   | 198(2)   | 40(3)   | 3322(4)  | 47(2)          |
| O(9)   | 2199(2)  | 1837(2) | 825(4)   | 30(1)          |
| O(10)  | 1226(2)  | 1848(2) | 1308(4)  | 34(1)          |
| O(11)  | 256(3)   | 2378(2) | -439(5)  | 40(1)          |
| O(12)  | 734(4)   | 3171(3) | 199(9)   | 109(4)         |
| O(13)  | 1921(3)  | 93(4)   | -908(5)  | 80(3)          |
| O(14)  | 3055(4)  | -188(3) | -578(5)  | 81(3)          |
| O(15)  | 2822(8)  | 581(6)  | 97(13)   | 82(6)          |
| O(16)  | 2463(7)  | -171(6) | 751(9)   | 63(5)          |
| O(15A) | 2795(8)  | 270(6)  | 810(11)  | 78(6)          |
| O(16A) | 2594(10) | 670(6)  | -579(17) | 95(7)          |
| O(17)  | 4098(3)  | 853(3)  | 2604(5)  | 52(2)          |
| O(18)  | 5226(3)  | 1129(2) | 2809(5)  | 50(2)          |
| O(19)  | 4950(3)  | 584(2)  | 4087(5)  | 50(2)          |
| O(20)  | 4589(3)  | 1499(2) | 3900(5)  | 53(2)          |
| O(21)  | 7603(6)  | 1897(5) | 1729(10) | 51(4)          |

|        |          |         |          |       |
|--------|----------|---------|----------|-------|
| O(22)  | 6910(6)  | 2538(6) | 1412(11) | 71(5) |
| O(23)  | 7944(7)  | 2705(6) | 1938(13) | 83(6) |
| O(24)  | 7406(10) | 2370(8) | 2986(11) | 99(7) |
| O(21A) | 8122(5)  | 2278(5) | 2694(9)  | 60(4) |
| O(22A) | 7351(6)  | 2364(5) | 1134(8)  | 73(4) |
| O(23A) | 7412(5)  | 2946(4) | 2346(9)  | 58(4) |
| O(24A) | 7047(5)  | 2184(5) | 2594(9)  | 57(3) |
| O(25)  | 3354(2)  | 2147(2) | 3941(4)  | 28(1) |
| O(26)  | 1825(2)  | 1941(2) | 4238(4)  | 25(1) |
| O(27)  | 2328(7)  | 3043(5) | 3116(11) | 47(5) |
| O(27A) | 2012(5)  | 3013(4) | 2300(8)  | 37(3) |
| N(1)   | 4867(3)  | 992(2)  | -569(4)  | 19(1) |
| N(2)   | 4999(3)  | 2118(2) | -2626(4) | 23(1) |
| N(3)   | 5694(3)  | 1090(3) | -2297(5) | 38(2) |
| N(4)   | 5849(3)  | 1810(2) | -626(4)  | 24(1) |
| N(5)   | 2822(3)  | -132(2) | 4159(4)  | 21(1) |
| N(6)   | 1503(3)  | 212(2)  | 5800(4)  | 25(1) |
| N(7)   | 2938(3)  | 156(2)  | 6273(4)  | 21(1) |
| N(8)   | 2204(3)  | -817(2) | 5867(4)  | 28(1) |
| N(9)   | 555(4)   | 1184(3) | -357(6)  | 53(2) |
| N(10)  | -4(4)    | 1128(4) | 1394(6)  | 57(2) |
| N(12)  | -352(4)  | 2235(4) | 1096(7)  | 72(3) |
| C(1)   | 4035(3)  | 1674(3) | -104(5)  | 18(1) |
| C(2)   | 4242(3)  | 1082(3) | -189(5)  | 23(2) |
| C(3)   | 3772(3)  | 1899(3) | -2966(5) | 28(2) |
| C(4)   | 4296(3)  | 2353(3) | -2910(6) | 29(2) |
| C(5)   | 5122(4)  | 1852(3) | -3576(6) | 31(2) |
| C(6)   | 5694(5)  | 1439(4) | -3311(7) | 45(2) |
| C(7)   | 5450(5)  | 559(4)  | -2576(8) | 54(2) |
| C(8)   | 5311(4)  | 268(3)  | -1654(6) | 35(2) |
| C(9)   | 4759(4)  | 463(3)  | -1172(6) | 28(2) |
| C(10)  | 5514(3)  | 1034(3) | 316(5)   | 23(1) |
| C(11)  | 5786(4)  | 1619(3) | 426(5)   | 26(2) |
| C(12)  | 6483(4)  | 1609(3) | -872(6)  | 35(2) |
| C(13)  | 6371(4)  | 1102(4) | -1521(6) | 39(2) |
| C(14)  | 5742(4)  | 2409(3) | -881(6)  | 34(2) |
| C(15)  | 5548(4)  | 2508(3) | -2080(6) | 31(2) |

|        |          |          |          |         |
|--------|----------|----------|----------|---------|
| C(16)  | 2438(3)  | 790(3)   | 3379(5)  | 21(1)   |
| C(17)  | 2612(3)  | 199(3)   | 3172(5)  | 24(2)   |
| C(18)  | 775(4)   | 45(3)    | 3959(6)  | 32(2)   |
| C(19)  | 879(3)   | 376(3)   | 4981(6)  | 32(2)   |
| C(20)  | 1376(4)  | -242(3)  | 6467(6)  | 32(2)   |
| C(21)  | 1509(4)  | -800(3)  | 6044(6)  | 34(2)   |
| C(22)  | 2304(4)  | -1246(3) | 5157(6)  | 35(2)   |
| C(23)  | 2918(4)  | -1149(3) | 4712(6)  | 32(2)   |
| C(24)  | 2840(4)  | -717(3)  | 3856(5)  | 28(2)   |
| C(25)  | 3508(3)  | 67(3)    | 4847(5)  | 26(2)   |
| C(26)  | 3423(3)  | 424(3)   | 5771(6)  | 29(2)   |
| C(27)  | 3267(3)  | -335(3)  | 6869(5)  | 29(2)   |
| C(28)  | 2753(4)  | -785(3)  | 6872(6)  | 34(2)   |
| C(29)  | 2637(4)  | 516(3)   | 6953(6)  | 31(2)   |
| C(30)  | 1894(4)  | 670(3)   | 6430(6)  | 30(2)   |
| C(31)  | 1576(4)  | 1723(3)  | 682(6)   | 27(2)   |
| C(32)  | 1230(4)  | 1420(3)  | -331(7)  | 42(2)   |
| C(33)  | 381(5)   | 2770(4)  | 226(10)  | 63(3)   |
| C(34)  | 100(5)   | 2706(5)  | 1209(9)  | 77(4)   |
| C(35)  | -1055(3) | 2359(2)  | 393(5)   | 111(6)  |
| N(11)  | -1039(3) | 1506(2)  | -307(5)  | 71(5)   |
| C(36)  | -1528(3) | 1865(2)  | -49(5)   | 53(5)   |
| C(37)  | -1141(3) | 1434(2)  | -1444(5) | 135(7)  |
| C(38)  | -595(3)  | 1058(2)  | -1629(5) | 171(17) |
| C(43)  | -1188(3) | 980(2)   | 115(5)   | 130(12) |
| N(11A) | -914(3)  | 1319(2)  | -661(5)  | 80(7)   |
| C(36A) | -1329(3) | 1788(2)  | -271(5)  | 129(14) |
| C(37A) | -1177(3) | 1480(2)  | -1756(5) | 135(7)  |
| C(38A) | -557(3)  | 1085(2)  | -1911(5) | 51(6)   |
| C(43A) | -910(3)  | 738(2)   | -170(5)  | 55(7)   |
| C(39)  | 173(3)   | 1075(2)  | -1498(5) | 113(6)  |
| C(40)  | 641(7)   | 679(5)   | 285(10)  | 90(4)   |
| C(41)  | 594(5)   | 763(4)   | 1369(8)  | 57(3)   |
| C(42)  | -674(5)  | 841(5)   | 1100(8)  | 82(4)   |
| C(44)  | 80(5)    | 1450(5)  | 2339(9)  | 72(3)   |
| C(45)  | -363(6)  | 1943(6)  | 2162(11) | 93(4)   |

Table S8. Bond lengths [ $\text{\AA}$ ] and angles [ $^\circ$ ] for **12**.

---

|              |           |
|--------------|-----------|
| Cu(1)-N(2)   | 1.955(6)  |
| Cu(1)-N(1)   | 1.968(5)  |
| Cu(1)-O(3)   | 1.981(4)  |
| Cu(1)-N(4)   | 2.041(5)  |
| Cu(1)-N(3)   | 2.244(6)  |
| Cu(2)-O(7)   | 1.960(4)  |
| Cu(2)-N(5)   | 1.975(5)  |
| Cu(2)-N(6)   | 1.988(6)  |
| Cu(2)-N(7)   | 2.051(5)  |
| Cu(2)-N(8)   | 2.228(6)  |
| Cu(3)-N(12)  | 1.956(9)  |
| Cu(3)-N(9)   | 1.995(9)  |
| Cu(3)-O(11)  | 1.997(6)  |
| Cu(3)-N(10)  | 2.055(8)  |
| Cu(3)-N(11)  | 2.202(5)  |
| Cu(3)-N(11A) | 2.250(5)  |
| Cu(3)-O(10)  | 2.391(5)  |
| Cl(1)-O(19)  | 1.417(5)  |
| Cl(1)-O(20)  | 1.424(6)  |
| Cl(1)-O(17)  | 1.434(6)  |
| Cl(1)-O(18)  | 1.446(5)  |
| Cl(3)-O(24)  | 1.196(12) |
| Cl(3)-O(23)  | 1.243(12) |
| Cl(3)-O(22A) | 1.254(10) |
| Cl(3)-O(21A) | 1.305(9)  |
| Cl(3)-O(24A) | 1.343(9)  |
| Cl(3)-O(22)  | 1.347(11) |
| Cl(3)-O(21)  | 1.377(10) |
| Cl(3)-O(23A) | 1.400(9)  |
| Cl(2)-O(15)  | 1.341(12) |
| Cl(2)-O(15A) | 1.344(13) |
| Cl(2)-O(13)  | 1.372(7)  |
| Cl(2)-O(14)  | 1.414(6)  |
| Cl(2)-O(16)  | 1.443(11) |
| Cl(2)-O(16A) | 1.533(15) |

|               |           |
|---------------|-----------|
| Na(1)-O(9)    | 2.266(5)  |
| Na(1)-O(4)#1  | 2.305(6)  |
| Na(1)-O(26)#2 | 2.377(5)  |
| Na(1)-O(25)#2 | 2.387(5)  |
| Na(1)-O(1)    | 2.405(5)  |
| Na(1)-O(27)#2 | 2.798(15) |
| Na(1)-Na(3)#2 | 3.226(4)  |
| Na(1)-Na(2)   | 3.530(4)  |
| Na(1)-Na(3)   | 3.940(4)  |
| Na(2)-O(15)   | 2.246(12) |
| Na(2)-O(5)    | 2.320(5)  |
| Na(2)-O(1)    | 2.322(5)  |
| Na(2)-O(9)    | 2.322(5)  |
| Na(2)-O(17)   | 2.397(6)  |
| Na(2)-O(15A)  | 2.443(14) |
| Na(2)-O(16A)  | 2.83(2)   |
| Na(2)-Na(3)   | 3.484(4)  |
| Na(3)-O(27A)  | 2.352(9)  |
| Na(3)-O(10)   | 2.377(5)  |
| Na(3)-O(26)   | 2.399(5)  |
| Na(3)-O(5)    | 2.411(6)  |
| Na(3)-O(27)   | 2.419(12) |
| Na(3)-O(25)   | 2.434(5)  |
| Na(3)-O(9)    | 2.504(6)  |
| Na(3)-C(31)   | 2.742(8)  |
| Na(3)-Na(1)#1 | 3.226(4)  |
| O(1)-C(1)     | 1.254(7)  |
| O(2)-C(1)     | 1.260(7)  |
| O(3)-C(3)     | 1.275(8)  |
| O(4)-C(3)     | 1.247(8)  |
| O(4)-Na(1)#2  | 2.305(6)  |
| O(5)-C(16)    | 1.246(8)  |
| O(6)-C(16)    | 1.252(7)  |
| O(7)-C(18)    | 1.286(8)  |
| O(8)-C(18)    | 1.235(8)  |
| O(9)-C(31)    | 1.253(8)  |
| O(10)-C(31)   | 1.259(8)  |

|               |           |
|---------------|-----------|
| O(11)-C(33)   | 1.278(11) |
| O(12)-C(33)   | 1.224(11) |
| O(25)-Na(1)#1 | 2.387(5)  |
| O(26)-Na(1)#1 | 2.378(5)  |
| O(27)-Na(1)#1 | 2.798(15) |
| N(1)-C(10)    | 1.495(8)  |
| N(1)-C(2)     | 1.495(8)  |
| N(1)-C(9)     | 1.508(8)  |
| N(2)-C(4)     | 1.483(8)  |
| N(2)-C(5)     | 1.485(8)  |
| N(2)-C(15)    | 1.495(9)  |
| N(3)-C(7)     | 1.410(11) |
| N(3)-C(13)    | 1.464(9)  |
| N(3)-C(6)     | 1.581(11) |
| N(4)-C(12)    | 1.489(8)  |
| N(4)-C(11)    | 1.493(8)  |
| N(4)-C(14)    | 1.515(9)  |
| N(5)-C(17)    | 1.489(8)  |
| N(5)-C(24)    | 1.496(9)  |
| N(5)-C(25)    | 1.515(8)  |
| N(6)-C(19)    | 1.471(8)  |
| N(6)-C(20)    | 1.482(9)  |
| N(6)-C(30)    | 1.491(9)  |
| N(7)-C(26)    | 1.477(8)  |
| N(7)-C(27)    | 1.492(8)  |
| N(7)-C(29)    | 1.496(9)  |
| N(8)-C(22)    | 1.457(9)  |
| N(8)-C(28)    | 1.474(9)  |
| N(8)-C(21)    | 1.485(9)  |
| N(9)-C(32)    | 1.474(10) |
| N(9)-C(40)    | 1.484(13) |
| N(9)-C(39)    | 1.506(9)  |
| N(10)-C(44)   | 1.440(14) |
| N(10)-C(42)   | 1.484(11) |
| N(10)-C(41)   | 1.514(12) |
| N(12)-C(34)   | 1.458(15) |
| N(12)-C(35)   | 1.499(9)  |

|              |           |
|--------------|-----------|
| N(12)-C(45)  | 1.575(14) |
| C(1)-C(2)    | 1.529(9)  |
| C(2)-H(2A)   | 0.9900    |
| C(2)-H(2B)   | 0.9900    |
| C(3)-C(4)    | 1.527(10) |
| C(4)-H(4A)   | 0.9900    |
| C(4)-H(4B)   | 0.9900    |
| C(5)-C(6)    | 1.508(11) |
| C(5)-H(5A)   | 0.9900    |
| C(5)-H(5B)   | 0.9900    |
| C(6)-H(6A)   | 0.9900    |
| C(6)-H(6B)   | 0.9900    |
| C(7)-C(8)    | 1.495(12) |
| C(7)-H(7A)   | 0.9900    |
| C(7)-H(7B)   | 0.9900    |
| C(8)-C(9)    | 1.501(10) |
| C(8)-H(8A)   | 0.9900    |
| C(8)-H(8B)   | 0.9900    |
| C(9)-H(9A)   | 0.9900    |
| C(9)-H(9B)   | 0.9900    |
| C(10)-C(11)  | 1.534(9)  |
| C(10)-H(10A) | 0.9900    |
| C(10)-H(10B) | 0.9900    |
| C(11)-H(11A) | 0.9900    |
| C(11)-H(11B) | 0.9900    |
| C(12)-C(13)  | 1.492(11) |
| C(12)-H(12A) | 0.9900    |
| C(12)-H(12B) | 0.9900    |
| C(13)-H(13A) | 0.9900    |
| C(13)-H(13B) | 0.9900    |
| C(14)-C(15)  | 1.531(10) |
| C(14)-H(14A) | 0.9900    |
| C(14)-H(14B) | 0.9900    |
| C(15)-H(15A) | 0.9900    |
| C(15)-H(15B) | 0.9900    |
| C(16)-C(17)  | 1.538(9)  |
| C(17)-H(17A) | 0.9900    |

|              |           |
|--------------|-----------|
| C(17)-H(17B) | 0.9900    |
| C(18)-C(19)  | 1.532(10) |
| C(19)-H(19A) | 0.9900    |
| C(19)-H(19B) | 0.9900    |
| C(20)-C(21)  | 1.531(11) |
| C(20)-H(20A) | 0.9900    |
| C(20)-H(20B) | 0.9900    |
| C(21)-H(21A) | 0.9900    |
| C(21)-H(21B) | 0.9900    |
| C(22)-C(23)  | 1.526(10) |
| C(22)-H(22A) | 0.9900    |
| C(22)-H(22B) | 0.9900    |
| C(23)-C(24)  | 1.523(10) |
| C(23)-H(23A) | 0.9900    |
| C(23)-H(23B) | 0.9900    |
| C(24)-H(24A) | 0.9900    |
| C(24)-H(24B) | 0.9900    |
| C(25)-C(26)  | 1.542(10) |
| C(25)-H(25A) | 0.9900    |
| C(25)-H(25B) | 0.9900    |
| C(26)-H(26A) | 0.9900    |
| C(26)-H(26B) | 0.9900    |
| C(27)-C(28)  | 1.518(10) |
| C(27)-H(27B) | 0.9900    |
| C(27)-H(27C) | 0.9900    |
| C(28)-H(28A) | 0.9900    |
| C(28)-H(28B) | 0.9900    |
| C(29)-C(30)  | 1.520(10) |
| C(29)-H(29A) | 0.9900    |
| C(29)-H(29B) | 0.9900    |
| C(30)-H(30A) | 0.9900    |
| C(30)-H(30B) | 0.9900    |
| C(31)-C(32)  | 1.516(10) |
| C(32)-H(32A) | 0.9900    |
| C(32)-H(32B) | 0.9900    |
| C(33)-C(34)  | 1.550(15) |
| C(34)-H(34A) | 0.9900    |



|               |          |
|---------------|----------|
| C(34)-H(34B)  | 0.9900   |
| C(35)-C(36)   | 1.5573   |
| C(35)-C(36A)  | 1.6645   |
| C(35)-H(35A)  | 0.9900   |
| C(35)-H(35B)  | 0.9900   |
| N(11)-C(36)   | 1.4313   |
| N(11)-C(37)   | 1.4571   |
| N(11)-C(43)   | 1.4717   |
| N(11)-H(36D)  | 1.4069   |
| C(36)-H(36A)  | 0.9601   |
| C(36)-H(36B)  | 0.9599   |
| C(36)-H(36C)  | 1.0795   |
| C(36)-H(36D)  | 0.7103   |
| C(37)-C(38)   | 1.5096   |
| C(37)-H(37A)  | 0.9599   |
| C(37)-H(37B)  | 0.9601   |
| C(37)-H(37C)  | 1.2041   |
| C(37)-H(37D)  | 1.1386   |
| C(38)-C(39)   | 1.5152   |
| C(38)-H(38A)  | 0.9600   |
| C(38)-H(38B)  | 0.9600   |
| C(38)-H(38C)  | 1.3437   |
| C(38)-H(38D)  | 0.8351   |
| C(43)-C(42)   | 1.460(9) |
| C(43)-H(43A)  | 0.9600   |
| C(43)-H(43B)  | 0.9602   |
| C(43)-H(43D)  | 1.1818   |
| N(11A)-C(37A) | 1.4426   |
| N(11A)-C(43A) | 1.5664   |
| N(11A)-C(36A) | 1.5930   |
| C(36A)-H(36A) | 1.1890   |
| C(36A)-H(36B) | 1.4325   |
| C(36A)-H(36C) | 0.9601   |
| C(36A)-H(36D) | 0.9601   |
| C(37A)-C(38A) | 1.6431   |
| C(37A)-H(37A) | 0.7474   |
| C(37A)-H(37B) | 0.9621   |

|                 |           |
|-----------------|-----------|
| C(37A)-H(37C)   | 0.9600    |
| C(37A)-H(37D)   | 0.9601    |
| C(38A)-C(39)    | 1.4269    |
| C(38A)-H(38A)   | 0.7064    |
| C(38A)-H(38B)   | 1.2761    |
| C(38A)-H(38C)   | 0.9600    |
| C(38A)-H(38D)   | 0.9602    |
| C(43A)-C(42)    | 1.620(11) |
| C(43A)-H(43A)   | 0.5877    |
| C(43A)-H(43C)   | 0.9600    |
| C(43A)-H(43D)   | 0.9600    |
| C(39)-H(39A)    | 0.9899    |
| C(39)-H(39B)    | 0.9901    |
| C(40)-C(41)     | 1.462(15) |
| C(40)-H(40A)    | 0.9900    |
| C(40)-H(40B)    | 0.9900    |
| C(41)-H(41A)    | 0.9900    |
| C(41)-H(41B)    | 0.9900    |
| C(42)-H(42A)    | 0.9900    |
| C(42)-H(42B)    | 0.9900    |
| C(44)-C(45)     | 1.489(16) |
| C(44)-H(44A)    | 0.9900    |
| C(44)-H(44B)    | 0.9900    |
| C(45)-H(45A)    | 0.9900    |
| C(45)-H(45B)    | 0.9900    |
|                 |           |
| N(2)-Cu(1)-N(1) | 176.8(2)  |
| N(2)-Cu(1)-O(3) | 84.5(2)   |
| N(1)-Cu(1)-O(3) | 95.1(2)   |
| N(2)-Cu(1)-N(4) | 89.5(2)   |
| N(1)-Cu(1)-N(4) | 90.2(2)   |
| O(3)-Cu(1)-N(4) | 167.0(2)  |
| N(2)-Cu(1)-N(3) | 85.8(3)   |
| N(1)-Cu(1)-N(3) | 97.3(2)   |
| O(3)-Cu(1)-N(3) | 110.7(2)  |
| N(4)-Cu(1)-N(3) | 80.2(2)   |
| O(7)-Cu(2)-N(5) | 97.4(2)   |

|                    |           |
|--------------------|-----------|
| O(7)-Cu(2)-N(6)    | 86.3(2)   |
| N(5)-Cu(2)-N(6)    | 168.7(2)  |
| O(7)-Cu(2)-N(7)    | 174.0(2)  |
| N(5)-Cu(2)-N(7)    | 88.3(2)   |
| N(6)-Cu(2)-N(7)    | 87.7(2)   |
| O(7)-Cu(2)-N(8)    | 99.2(2)   |
| N(5)-Cu(2)-N(8)    | 103.4(2)  |
| N(6)-Cu(2)-N(8)    | 86.4(2)   |
| N(7)-Cu(2)-N(8)    | 81.3(2)   |
| N(12)-Cu(3)-N(9)   | 174.1(3)  |
| N(12)-Cu(3)-O(11)  | 84.2(3)   |
| N(9)-Cu(3)-O(11)   | 97.3(3)   |
| N(12)-Cu(3)-N(10)  | 89.1(4)   |
| N(9)-Cu(3)-N(10)   | 88.3(3)   |
| O(11)-Cu(3)-N(10)  | 166.3(3)  |
| N(12)-Cu(3)-N(11)  | 79.6(3)   |
| N(9)-Cu(3)-N(11)   | 105.2(3)  |
| O(11)-Cu(3)-N(11)  | 109.2(2)  |
| N(10)-Cu(3)-N(11)  | 81.0(2)   |
| N(12)-Cu(3)-N(11A) | 98.9(3)   |
| N(9)-Cu(3)-N(11A)  | 86.1(3)   |
| O(11)-Cu(3)-N(11A) | 109.9(2)  |
| N(10)-Cu(3)-N(11A) | 82.9(3)   |
| N(11)-Cu(3)-N(11A) | 19.3      |
| N(12)-Cu(3)-O(10)  | 96.9(3)   |
| N(9)-Cu(3)-O(10)   | 77.6(2)   |
| O(11)-Cu(3)-O(10)  | 81.8(2)   |
| N(10)-Cu(3)-O(10)  | 87.3(2)   |
| N(11)-Cu(3)-O(10)  | 167.9(2)  |
| N(11A)-Cu(3)-O(10) | 161.2(2)  |
| O(19)-Cl(1)-O(20)  | 112.3(4)  |
| O(19)-Cl(1)-O(17)  | 108.5(4)  |
| O(20)-Cl(1)-O(17)  | 109.8(4)  |
| O(19)-Cl(1)-O(18)  | 108.8(4)  |
| O(20)-Cl(1)-O(18)  | 109.9(4)  |
| O(17)-Cl(1)-O(18)  | 107.4(4)  |
| O(24)-Cl(3)-O(23)  | 122.1(12) |

|                     |           |
|---------------------|-----------|
| O(24)-Cl(3)-O(22A)  | 156.3(11) |
| O(23)-Cl(3)-O(22A)  | 79.7(9)   |
| O(24)-Cl(3)-O(21A)  | 80.1(10)  |
| O(23)-Cl(3)-O(21A)  | 67.7(9)   |
| O(22A)-Cl(3)-O(21A) | 119.9(8)  |
| O(24)-Cl(3)-O(24A)  | 40.6(9)   |
| O(23)-Cl(3)-O(24A)  | 161.1(9)  |
| O(22A)-Cl(3)-O(24A) | 116.3(7)  |
| O(21A)-Cl(3)-O(24A) | 108.7(7)  |
| O(24)-Cl(3)-O(22)   | 109.1(10) |
| O(23)-Cl(3)-O(22)   | 105.0(9)  |
| O(22A)-Cl(3)-O(22)  | 51.6(8)   |
| O(21A)-Cl(3)-O(22)  | 170.7(8)  |
| O(24A)-Cl(3)-O(22)  | 80.1(8)   |
| O(24)-Cl(3)-O(21)   | 112.4(10) |
| O(23)-Cl(3)-O(21)   | 106.3(9)  |
| O(22A)-Cl(3)-O(21)  | 64.3(8)   |
| O(21A)-Cl(3)-O(21)  | 78.0(7)   |
| O(24A)-Cl(3)-O(21)  | 90.5(8)   |
| O(22)-Cl(3)-O(21)   | 99.3(8)   |
| O(24)-Cl(3)-O(23A)  | 78.5(10)  |
| O(23)-Cl(3)-O(23A)  | 66.3(9)   |
| O(22A)-Cl(3)-O(23A) | 105.6(7)  |
| O(21A)-Cl(3)-O(23A) | 105.1(7)  |
| O(24A)-Cl(3)-O(23A) | 98.2(7)   |
| O(22)-Cl(3)-O(23A)  | 75.9(8)   |
| O(21)-Cl(3)-O(23A)  | 169.1(7)  |
| O(15)-Cl(2)-O(15A)  | 54.0(8)   |
| O(15)-Cl(2)-O(13)   | 114.1(9)  |
| O(15A)-Cl(2)-O(13)  | 133.0(8)  |
| O(15)-Cl(2)-O(14)   | 105.5(8)  |
| O(15A)-Cl(2)-O(14)  | 114.3(8)  |
| O(13)-Cl(2)-O(14)   | 112.6(4)  |
| O(15)-Cl(2)-O(16)   | 107.1(9)  |
| O(15A)-Cl(2)-O(16)  | 54.0(8)   |
| O(13)-Cl(2)-O(16)   | 105.8(6)  |
| O(14)-Cl(2)-O(16)   | 111.8(6)  |

|                       |            |
|-----------------------|------------|
| O(15)-Cl(2)-O(16A)    | 36.0(8)    |
| O(15A)-Cl(2)-O(16A)   | 88.3(10)   |
| O(13)-Cl(2)-O(16A)    | 83.2(9)    |
| O(14)-Cl(2)-O(16A)    | 103.0(8)   |
| O(16)-Cl(2)-O(16A)    | 136.3(10)  |
| O(9)-Na(1)-O(4)#1     | 97.6(2)    |
| O(9)-Na(1)-O(26)#2    | 102.27(19) |
| O(4)#1-Na(1)-O(26)#2  | 96.7(2)    |
| O(9)-Na(1)-O(25)#2    | 158.7(2)   |
| O(4)#1-Na(1)-O(25)#2  | 100.8(2)   |
| O(26)#2-Na(1)-O(25)#2 | 86.27(17)  |
| O(9)-Na(1)-O(1)       | 79.96(18)  |
| O(4)#1-Na(1)-O(1)     | 103.1(2)   |
| O(26)#2-Na(1)-O(1)    | 159.7(2)   |
| O(25)#2-Na(1)-O(1)    | 85.44(17)  |
| O(9)-Na(1)-O(27)#2    | 91.2(3)    |
| O(4)#1-Na(1)-O(27)#2  | 171.2(3)   |
| O(26)#2-Na(1)-O(27)#2 | 80.9(3)    |
| O(25)#2-Na(1)-O(27)#2 | 70.7(3)    |
| O(1)-Na(1)-O(27)#2    | 78.9(3)    |
| O(9)-Na(1)-Na(3)#2    | 125.25(16) |
| O(4)#1-Na(1)-Na(3)#2  | 125.99(19) |
| O(26)#2-Na(1)-Na(3)#2 | 47.79(13)  |
| O(25)#2-Na(1)-Na(3)#2 | 48.63(13)  |
| O(1)-Na(1)-Na(3)#2    | 114.44(15) |
| O(27)#2-Na(1)-Na(3)#2 | 46.7(3)    |
| O(9)-Na(1)-Na(2)      | 40.29(13)  |
| O(4)#1-Na(1)-Na(2)    | 96.09(17)  |
| O(26)#2-Na(1)-Na(2)   | 141.82(15) |
| O(25)#2-Na(1)-Na(2)   | 126.12(15) |
| O(1)-Na(1)-Na(2)      | 40.80(12)  |
| O(27)#2-Na(1)-Na(2)   | 91.0(3)    |
| Na(3)#2-Na(1)-Na(2)   | 137.63(11) |
| O(9)-Na(1)-Na(3)      | 36.31(14)  |
| O(4)#1-Na(1)-Na(3)    | 61.50(16)  |
| O(26)#2-Na(1)-Na(3)   | 101.22(14) |
| O(25)#2-Na(1)-Na(3)   | 161.24(16) |

|                     |            |
|---------------------|------------|
| O(1)-Na(1)-Na(3)    | 92.42(13)  |
| O(27)#2-Na(1)-Na(3) | 127.2(3)   |
| Na(3)#2-Na(1)-Na(3) | 146.01(11) |
| Na(2)-Na(1)-Na(3)   | 55.27(7)   |
| O(15)-Na(2)-O(5)    | 118.4(4)   |
| O(15)-Na(2)-O(1)    | 89.1(4)    |
| O(5)-Na(2)-O(1)     | 149.0(2)   |
| O(15)-Na(2)-O(9)    | 102.6(5)   |
| O(5)-Na(2)-O(9)     | 79.66(18)  |
| O(1)-Na(2)-O(9)     | 80.58(18)  |
| O(15)-Na(2)-O(17)   | 103.3(5)   |
| O(5)-Na(2)-O(17)    | 88.2(2)    |
| O(1)-Na(2)-O(17)    | 99.7(2)    |
| O(9)-Na(2)-O(17)    | 154.1(2)   |
| O(15)-Na(2)-O(15A)  | 29.8(5)    |
| O(5)-Na(2)-O(15A)   | 93.4(4)    |
| O(1)-Na(2)-O(15A)   | 116.7(4)   |
| O(9)-Na(2)-O(15A)   | 116.0(4)   |
| O(17)-Na(2)-O(15A)  | 87.2(4)    |
| O(15)-Na(2)-O(16A)  | 15.8(5)    |
| O(5)-Na(2)-O(16A)   | 123.5(4)   |
| O(1)-Na(2)-O(16A)   | 79.4(4)    |
| O(9)-Na(2)-O(16A)   | 88.6(4)    |
| O(17)-Na(2)-O(16A)  | 117.0(4)   |
| O(15A)-Na(2)-O(16A) | 44.1(5)    |
| O(15)-Na(2)-Na(3)   | 138.8(4)   |
| O(5)-Na(2)-Na(3)    | 43.58(14)  |
| O(1)-Na(2)-Na(3)    | 106.44(15) |
| O(9)-Na(2)-Na(3)    | 45.90(14)  |
| O(17)-Na(2)-Na(3)   | 111.00(18) |
| O(15A)-Na(2)-Na(3)  | 129.4(4)   |
| O(16A)-Na(2)-Na(3)  | 129.8(4)   |
| O(15)-Na(2)-Na(1)   | 105.3(5)   |
| O(5)-Na(2)-Na(1)    | 111.33(15) |
| O(1)-Na(2)-Na(1)    | 42.59(13)  |
| O(9)-Na(2)-Na(1)    | 39.13(13)  |
| O(17)-Na(2)-Na(1)   | 130.89(19) |

|                      |            |
|----------------------|------------|
| O(15A)-Na(2)-Na(1)   | 133.0(4)   |
| O(16A)-Na(2)-Na(1)   | 89.8(3)    |
| Na(3)-Na(2)-Na(1)    | 68.36(8)   |
| O(27A)-Na(3)-O(10)   | 90.6(3)    |
| O(27A)-Na(3)-O(26)   | 104.3(3)   |
| O(10)-Na(3)-O(26)    | 101.59(18) |
| O(27A)-Na(3)-O(5)    | 167.1(3)   |
| O(10)-Na(3)-O(5)     | 87.4(2)    |
| O(26)-Na(3)-O(5)     | 88.64(18)  |
| O(27A)-Na(3)-O(27)   | 26.3(3)    |
| O(10)-Na(3)-O(27)    | 114.9(4)   |
| O(26)-Na(3)-O(27)    | 88.8(4)    |
| O(5)-Na(3)-O(27)     | 157.7(4)   |
| O(27A)-Na(3)-O(25)   | 99.4(3)    |
| O(10)-Na(3)-O(25)    | 166.5(2)   |
| O(26)-Na(3)-O(25)    | 84.74(17)  |
| O(5)-Na(3)-O(25)     | 80.79(18)  |
| O(27)-Na(3)-O(25)    | 76.9(4)    |
| O(27A)-Na(3)-O(9)    | 94.1(3)    |
| O(10)-Na(3)-O(9)     | 54.13(16)  |
| O(26)-Na(3)-O(9)     | 150.1(2)   |
| O(5)-Na(3)-O(9)      | 74.43(18)  |
| O(27)-Na(3)-O(9)     | 116.0(4)   |
| O(25)-Na(3)-O(9)     | 115.65(18) |
| O(27A)-Na(3)-C(31)   | 95.7(3)    |
| O(10)-Na(3)-C(31)    | 27.30(18)  |
| O(26)-Na(3)-C(31)    | 125.6(2)   |
| O(5)-Na(3)-C(31)     | 76.9(2)    |
| O(27)-Na(3)-C(31)    | 121.9(4)   |
| O(25)-Na(3)-C(31)    | 141.1(2)   |
| O(9)-Na(3)-C(31)     | 27.15(17)  |
| O(27A)-Na(3)-Na(1)#1 | 82.8(3)    |
| O(10)-Na(3)-Na(1)#1  | 144.03(16) |
| O(26)-Na(3)-Na(1)#1  | 47.23(13)  |
| O(5)-Na(3)-Na(1)#1   | 106.12(15) |
| O(27)-Na(3)-Na(1)#1  | 57.3(4)    |
| O(25)-Na(3)-Na(1)#1  | 47.38(12)  |

|                     |            |
|---------------------|------------|
| O(9)-Na(3)-Na(1)#1  | 161.22(16) |
| C(31)-Na(3)-Na(1)#1 | 171.33(18) |
| O(27A)-Na(3)-Na(2)  | 125.5(3)   |
| O(10)-Na(3)-Na(2)   | 84.63(15)  |
| O(26)-Na(3)-Na(2)   | 129.89(16) |
| O(5)-Na(3)-Na(2)    | 41.57(12)  |
| O(27)-Na(3)-Na(2)   | 133.8(3)   |
| O(25)-Na(3)-Na(2)   | 82.18(14)  |
| O(9)-Na(3)-Na(2)    | 41.75(12)  |
| C(31)-Na(3)-Na(2)   | 60.07(16)  |
| Na(1)#1-Na(3)-Na(2) | 127.52(10) |
| O(27A)-Na(3)-Na(1)  | 69.7(2)    |
| O(10)-Na(3)-Na(1)   | 76.91(14)  |
| O(26)-Na(3)-Na(1)   | 173.62(16) |
| O(5)-Na(3)-Na(1)    | 97.45(14)  |
| O(27)-Na(3)-Na(1)   | 86.3(3)    |
| O(25)-Na(3)-Na(1)   | 98.06(14)  |
| O(9)-Na(3)-Na(1)    | 32.40(13)  |
| C(31)-Na(3)-Na(1)   | 54.63(15)  |
| Na(1)#1-Na(3)-Na(1) | 131.75(10) |
| Na(2)-Na(3)-Na(1)   | 56.37(7)   |
| C(1)-O(1)-Na(2)     | 134.3(4)   |
| C(1)-O(1)-Na(1)     | 128.5(4)   |
| Na(2)-O(1)-Na(1)    | 96.60(18)  |
| C(3)-O(3)-Cu(1)     | 109.3(4)   |
| C(3)-O(4)-Na(1)#2   | 126.6(5)   |
| C(16)-O(5)-Na(2)    | 138.4(4)   |
| C(16)-O(5)-Na(3)    | 126.7(4)   |
| Na(2)-O(5)-Na(3)    | 94.85(19)  |
| C(18)-O(7)-Cu(2)    | 112.6(4)   |
| C(31)-O(9)-Na(1)    | 132.4(4)   |
| C(31)-O(9)-Na(2)    | 122.9(5)   |
| Na(1)-O(9)-Na(2)    | 100.6(2)   |
| C(31)-O(9)-Na(3)    | 87.1(4)    |
| Na(1)-O(9)-Na(3)    | 111.3(2)   |
| Na(2)-O(9)-Na(3)    | 92.35(18)  |
| C(31)-O(10)-Na(3)   | 92.7(4)    |



|                     |           |
|---------------------|-----------|
| C(31)-O(10)-Cu(3)   | 105.0(4)  |
| Na(3)-O(10)-Cu(3)   | 162.2(2)  |
| C(33)-O(11)-Cu(3)   | 108.0(6)  |
| Cl(2)-O(15)-Na(2)   | 145.6(11) |
| Cl(2)-O(15A)-Na(2)  | 127.9(10) |
| Cl(2)-O(16A)-Na(2)  | 99.7(10)  |
| Cl(1)-O(17)-Na(2)   | 142.1(4)  |
| Na(1)#1-O(25)-Na(3) | 84.00(17) |
| Na(1)#1-O(26)-Na(3) | 84.98(17) |
| Na(3)-O(27)-Na(1)#1 | 76.0(4)   |
| C(10)-N(1)-C(2)     | 111.8(5)  |
| C(10)-N(1)-C(9)     | 115.9(5)  |
| C(2)-N(1)-C(9)      | 106.7(5)  |
| C(10)-N(1)-Cu(1)    | 106.0(4)  |
| C(2)-N(1)-Cu(1)     | 111.5(4)  |
| C(9)-N(1)-Cu(1)     | 104.8(4)  |
| C(4)-N(2)-C(5)      | 109.2(5)  |
| C(4)-N(2)-C(15)     | 113.8(6)  |
| C(5)-N(2)-C(15)     | 114.3(5)  |
| C(4)-N(2)-Cu(1)     | 103.1(4)  |
| C(5)-N(2)-Cu(1)     | 107.3(4)  |
| C(15)-N(2)-Cu(1)    | 108.3(4)  |
| C(7)-N(3)-C(13)     | 113.2(7)  |
| C(7)-N(3)-C(6)      | 111.4(7)  |
| C(13)-N(3)-C(6)     | 111.1(7)  |
| C(7)-N(3)-Cu(1)     | 109.6(5)  |
| C(13)-N(3)-Cu(1)    | 108.6(4)  |
| C(6)-N(3)-Cu(1)     | 102.5(4)  |
| C(12)-N(4)-C(11)    | 112.9(6)  |
| C(12)-N(4)-C(14)    | 110.8(6)  |
| C(11)-N(4)-C(14)    | 117.8(5)  |
| C(12)-N(4)-Cu(1)    | 115.3(4)  |
| C(11)-N(4)-Cu(1)    | 101.6(4)  |
| C(14)-N(4)-Cu(1)    | 97.2(4)   |
| C(17)-N(5)-C(24)    | 108.6(5)  |
| C(17)-N(5)-C(25)    | 109.7(5)  |
| C(24)-N(5)-C(25)    | 112.6(5)  |

|                   |           |
|-------------------|-----------|
| C(17)-N(5)-Cu(2)  | 109.3(4)  |
| C(24)-N(5)-Cu(2)  | 109.2(4)  |
| C(25)-N(5)-Cu(2)  | 107.4(4)  |
| C(19)-N(6)-C(20)  | 112.6(5)  |
| C(19)-N(6)-C(30)  | 114.5(6)  |
| C(20)-N(6)-C(30)  | 113.3(5)  |
| C(19)-N(6)-Cu(2)  | 104.1(4)  |
| C(20)-N(6)-Cu(2)  | 109.1(4)  |
| C(30)-N(6)-Cu(2)  | 102.0(4)  |
| C(26)-N(7)-C(27)  | 109.9(5)  |
| C(26)-N(7)-C(29)  | 115.2(5)  |
| C(27)-N(7)-C(29)  | 111.3(5)  |
| C(26)-N(7)-Cu(2)  | 101.7(4)  |
| C(27)-N(7)-Cu(2)  | 112.4(4)  |
| C(29)-N(7)-Cu(2)  | 105.9(4)  |
| C(22)-N(8)-C(28)  | 114.0(6)  |
| C(22)-N(8)-C(21)  | 114.9(6)  |
| C(28)-N(8)-C(21)  | 111.8(6)  |
| C(22)-N(8)-Cu(2)  | 106.8(4)  |
| C(28)-N(8)-Cu(2)  | 110.0(4)  |
| C(21)-N(8)-Cu(2)  | 97.7(4)   |
| C(32)-N(9)-C(40)  | 110.6(8)  |
| C(32)-N(9)-C(39)  | 108.3(6)  |
| C(40)-N(9)-C(39)  | 111.2(7)  |
| C(32)-N(9)-Cu(3)  | 107.8(5)  |
| C(40)-N(9)-Cu(3)  | 107.4(7)  |
| C(39)-N(9)-Cu(3)  | 111.6(5)  |
| C(44)-N(10)-C(42) | 111.7(9)  |
| C(44)-N(10)-C(41) | 116.0(8)  |
| C(42)-N(10)-C(41) | 112.9(9)  |
| C(44)-N(10)-Cu(3) | 101.0(7)  |
| C(42)-N(10)-Cu(3) | 112.3(6)  |
| C(41)-N(10)-Cu(3) | 101.9(5)  |
| C(34)-N(12)-C(35) | 111.3(8)  |
| C(34)-N(12)-C(45) | 115.6(10) |
| C(35)-N(12)-C(45) | 113.4(7)  |
| C(34)-N(12)-Cu(3) | 103.2(5)  |

|                   |          |
|-------------------|----------|
| C(35)-N(12)-Cu(3) | 105.9(6) |
| C(45)-N(12)-Cu(3) | 106.2(7) |
| O(1)-C(1)-O(2)    | 125.6(6) |
| O(1)-C(1)-C(2)    | 114.8(6) |
| O(2)-C(1)-C(2)    | 119.5(5) |
| N(1)-C(2)-C(1)    | 116.0(5) |
| N(1)-C(2)-H(2A)   | 108.3    |
| C(1)-C(2)-H(2A)   | 108.3    |
| N(1)-C(2)-H(2B)   | 108.3    |
| C(1)-C(2)-H(2B)   | 108.3    |
| H(2A)-C(2)-H(2B)  | 107.4    |
| O(4)-C(3)-O(3)    | 124.9(7) |
| O(4)-C(3)-C(4)    | 117.5(7) |
| O(3)-C(3)-C(4)    | 117.6(6) |
| N(2)-C(4)-C(3)    | 109.3(6) |
| N(2)-C(4)-H(4A)   | 109.8    |
| C(3)-C(4)-H(4A)   | 109.8    |
| N(2)-C(4)-H(4B)   | 109.8    |
| C(3)-C(4)-H(4B)   | 109.8    |
| H(4A)-C(4)-H(4B)  | 108.3    |
| N(2)-C(5)-C(6)    | 113.4(6) |
| N(2)-C(5)-H(5A)   | 108.9    |
| C(6)-C(5)-H(5A)   | 108.9    |
| N(2)-C(5)-H(5B)   | 108.9    |
| C(6)-C(5)-H(5B)   | 108.9    |
| H(5A)-C(5)-H(5B)  | 107.7    |
| C(5)-C(6)-N(3)    | 112.6(6) |
| C(5)-C(6)-H(6A)   | 109.1    |
| N(3)-C(6)-H(6A)   | 109.1    |
| C(5)-C(6)-H(6B)   | 109.1    |
| N(3)-C(6)-H(6B)   | 109.1    |
| H(6A)-C(6)-H(6B)  | 107.8    |
| N(3)-C(7)-C(8)    | 111.4(8) |
| N(3)-C(7)-H(7A)   | 109.3    |
| C(8)-C(7)-H(7A)   | 109.3    |
| N(3)-C(7)-H(7B)   | 109.3    |
| C(8)-C(7)-H(7B)   | 109.3    |

|                     |          |
|---------------------|----------|
| H(7A)-C(7)-H(7B)    | 108.0    |
| C(7)-C(8)-C(9)      | 120.7(7) |
| C(7)-C(8)-H(8A)     | 107.2    |
| C(9)-C(8)-H(8A)     | 107.2    |
| C(7)-C(8)-H(8B)     | 107.2    |
| C(9)-C(8)-H(8B)     | 107.2    |
| H(8A)-C(8)-H(8B)    | 106.8    |
| C(8)-C(9)-N(1)      | 118.6(6) |
| C(8)-C(9)-H(9A)     | 107.7    |
| N(1)-C(9)-H(9A)     | 107.7    |
| C(8)-C(9)-H(9B)     | 107.7    |
| N(1)-C(9)-H(9B)     | 107.7    |
| H(9A)-C(9)-H(9B)    | 107.1    |
| N(1)-C(10)-C(11)    | 110.6(5) |
| N(1)-C(10)-H(10A)   | 109.5    |
| C(11)-C(10)-H(10A)  | 109.5    |
| N(1)-C(10)-H(10B)   | 109.5    |
| C(11)-C(10)-H(10B)  | 109.5    |
| H(10A)-C(10)-H(10B) | 108.1    |
| N(4)-C(11)-C(10)    | 109.1(5) |
| N(4)-C(11)-H(11A)   | 109.9    |
| C(10)-C(11)-H(11A)  | 109.9    |
| N(4)-C(11)-H(11B)   | 109.9    |
| C(10)-C(11)-H(11B)  | 109.9    |
| H(11A)-C(11)-H(11B) | 108.3    |
| C(13)-C(12)-N(4)    | 113.3(6) |
| C(13)-C(12)-H(12A)  | 108.9    |
| N(4)-C(12)-H(12A)   | 108.9    |
| C(13)-C(12)-H(12B)  | 108.9    |
| N(4)-C(12)-H(12B)   | 108.9    |
| H(12A)-C(12)-H(12B) | 107.7    |
| N(3)-C(13)-C(12)    | 112.3(6) |
| N(3)-C(13)-H(13A)   | 109.1    |
| C(12)-C(13)-H(13A)  | 109.1    |
| N(3)-C(13)-H(13B)   | 109.1    |
| C(12)-C(13)-H(13B)  | 109.1    |
| H(13A)-C(13)-H(13B) | 107.9    |

|                     |          |
|---------------------|----------|
| N(4)-C(14)-C(15)    | 111.2(6) |
| N(4)-C(14)-H(14A)   | 109.4    |
| C(15)-C(14)-H(14A)  | 109.4    |
| N(4)-C(14)-H(14B)   | 109.4    |
| C(15)-C(14)-H(14B)  | 109.4    |
| H(14A)-C(14)-H(14B) | 108.0    |
| N(2)-C(15)-C(14)    | 109.7(6) |
| N(2)-C(15)-H(15A)   | 109.7    |
| C(14)-C(15)-H(15A)  | 109.7    |
| N(2)-C(15)-H(15B)   | 109.7    |
| C(14)-C(15)-H(15B)  | 109.7    |
| H(15A)-C(15)-H(15B) | 108.2    |
| O(5)-C(16)-O(6)     | 125.8(6) |
| O(5)-C(16)-C(17)    | 116.8(6) |
| O(6)-C(16)-C(17)    | 117.3(6) |
| N(5)-C(17)-C(16)    | 112.9(5) |
| N(5)-C(17)-H(17A)   | 109.0    |
| C(16)-C(17)-H(17A)  | 109.0    |
| N(5)-C(17)-H(17B)   | 109.0    |
| C(16)-C(17)-H(17B)  | 109.0    |
| H(17A)-C(17)-H(17B) | 107.8    |
| O(8)-C(18)-O(7)     | 125.6(7) |
| O(8)-C(18)-C(19)    | 118.3(7) |
| O(7)-C(18)-C(19)    | 116.1(6) |
| N(6)-C(19)-C(18)    | 112.1(6) |
| N(6)-C(19)-H(19A)   | 109.2    |
| C(18)-C(19)-H(19A)  | 109.2    |
| N(6)-C(19)-H(19B)   | 109.2    |
| C(18)-C(19)-H(19B)  | 109.2    |
| H(19A)-C(19)-H(19B) | 107.9    |
| N(6)-C(20)-C(21)    | 112.8(6) |
| N(6)-C(20)-H(20A)   | 109.0    |
| C(21)-C(20)-H(20A)  | 109.0    |
| N(6)-C(20)-H(20B)   | 109.0    |
| C(21)-C(20)-H(20B)  | 109.0    |
| H(20A)-C(20)-H(20B) | 107.8    |
| N(8)-C(21)-C(20)    | 110.5(6) |

|                     |          |
|---------------------|----------|
| N(8)-C(21)-H(21A)   | 109.6    |
| C(20)-C(21)-H(21A)  | 109.6    |
| N(8)-C(21)-H(21B)   | 109.6    |
| C(20)-C(21)-H(21B)  | 109.6    |
| H(21A)-C(21)-H(21B) | 108.1    |
| N(8)-C(22)-C(23)    | 113.5(6) |
| N(8)-C(22)-H(22A)   | 108.9    |
| C(23)-C(22)-H(22A)  | 108.9    |
| N(8)-C(22)-H(22B)   | 108.9    |
| C(23)-C(22)-H(22B)  | 108.9    |
| H(22A)-C(22)-H(22B) | 107.7    |
| C(24)-C(23)-C(22)   | 117.2(6) |
| C(24)-C(23)-H(23A)  | 108.0    |
| C(22)-C(23)-H(23A)  | 108.0    |
| C(24)-C(23)-H(23B)  | 108.0    |
| C(22)-C(23)-H(23B)  | 108.0    |
| H(23A)-C(23)-H(23B) | 107.2    |
| N(5)-C(24)-C(23)    | 118.8(6) |
| N(5)-C(24)-H(24A)   | 107.6    |
| C(23)-C(24)-H(24A)  | 107.6    |
| N(5)-C(24)-H(24B)   | 107.6    |
| C(23)-C(24)-H(24B)  | 107.6    |
| H(24A)-C(24)-H(24B) | 107.0    |
| N(5)-C(25)-C(26)    | 111.8(5) |
| N(5)-C(25)-H(25A)   | 109.3    |
| C(26)-C(25)-H(25A)  | 109.3    |
| N(5)-C(25)-H(25B)   | 109.3    |
| C(26)-C(25)-H(25B)  | 109.3    |
| H(25A)-C(25)-H(25B) | 107.9    |
| N(7)-C(26)-C(25)    | 108.9(5) |
| N(7)-C(26)-H(26A)   | 109.9    |
| C(25)-C(26)-H(26A)  | 109.9    |
| N(7)-C(26)-H(26B)   | 109.9    |
| C(25)-C(26)-H(26B)  | 109.9    |
| H(26A)-C(26)-H(26B) | 108.3    |
| N(7)-C(27)-C(28)    | 112.6(5) |
| N(7)-C(27)-H(27B)   | 109.1    |

|                     |           |
|---------------------|-----------|
| C(28)-C(27)-H(27B)  | 109.1     |
| N(7)-C(27)-H(27C)   | 109.1     |
| C(28)-C(27)-H(27C)  | 109.1     |
| H(27B)-C(27)-H(27C) | 107.8     |
| N(8)-C(28)-C(27)    | 112.6(6)  |
| N(8)-C(28)-H(28A)   | 109.1     |
| C(27)-C(28)-H(28A)  | 109.1     |
| N(8)-C(28)-H(28B)   | 109.1     |
| C(27)-C(28)-H(28B)  | 109.1     |
| H(28A)-C(28)-H(28B) | 107.8     |
| N(7)-C(29)-C(30)    | 113.1(6)  |
| N(7)-C(29)-H(29A)   | 109.0     |
| C(30)-C(29)-H(29A)  | 109.0     |
| N(7)-C(29)-H(29B)   | 109.0     |
| C(30)-C(29)-H(29B)  | 109.0     |
| H(29A)-C(29)-H(29B) | 107.8     |
| N(6)-C(30)-C(29)    | 111.7(6)  |
| N(6)-C(30)-H(30A)   | 109.3     |
| C(29)-C(30)-H(30A)  | 109.3     |
| N(6)-C(30)-H(30B)   | 109.3     |
| C(29)-C(30)-H(30B)  | 109.3     |
| H(30A)-C(30)-H(30B) | 107.9     |
| O(9)-C(31)-O(10)    | 124.6(7)  |
| O(9)-C(31)-C(32)    | 116.6(7)  |
| O(10)-C(31)-C(32)   | 118.8(6)  |
| O(9)-C(31)-Na(3)    | 65.8(4)   |
| O(10)-C(31)-Na(3)   | 60.0(4)   |
| C(32)-C(31)-Na(3)   | 169.4(5)  |
| N(9)-C(32)-C(31)    | 114.7(7)  |
| N(9)-C(32)-H(32A)   | 108.6     |
| C(31)-C(32)-H(32A)  | 108.6     |
| N(9)-C(32)-H(32B)   | 108.6     |
| C(31)-C(32)-H(32B)  | 108.6     |
| H(32A)-C(32)-H(32B) | 107.6     |
| O(12)-C(33)-O(11)   | 126.7(10) |
| O(12)-C(33)-C(34)   | 117.1(11) |
| O(11)-C(33)-C(34)   | 116.0(9)  |

|                     |            |
|---------------------|------------|
| N(12)-C(34)-C(33)   | 111.0(9)   |
| N(12)-C(34)-H(34A)  | 109.4      |
| C(33)-C(34)-H(34A)  | 109.4      |
| N(12)-C(34)-H(34B)  | 109.4      |
| C(33)-C(34)-H(34B)  | 109.4      |
| H(34A)-C(34)-H(34B) | 108.0      |
| N(12)-C(35)-C(36)   | 116.9(5)   |
| N(12)-C(35)-C(36A)  | 105.9(5)   |
| C(36)-C(35)-C(36A)  | 20.6       |
| N(12)-C(35)-H(35A)  | 108.1      |
| C(36)-C(35)-H(35A)  | 108.1      |
| C(36A)-C(35)-H(35A) | 97.2       |
| N(12)-C(35)-H(35B)  | 108.1      |
| C(36)-C(35)-H(35B)  | 108.1      |
| C(36A)-C(35)-H(35B) | 128.7      |
| H(35A)-C(35)-H(35B) | 107.3      |
| C(36)-N(11)-C(37)   | 113.7      |
| C(36)-N(11)-C(43)   | 103.3      |
| C(37)-N(11)-C(43)   | 106.8      |
| C(36)-N(11)-Cu(3)   | 117.25(17) |
| C(37)-N(11)-Cu(3)   | 104.56(17) |
| C(43)-N(11)-Cu(3)   | 110.99(15) |
| C(36)-N(11)-H(36D)  | 29.0       |
| C(37)-N(11)-H(36D)  | 123.0      |
| C(43)-N(11)-H(36D)  | 74.3       |
| Cu(3)-N(11)-H(36D)  | 128.9      |
| N(11)-C(36)-C(35)   | 100.1      |
| N(11)-C(36)-H(36A)  | 111.8      |
| C(35)-C(36)-H(36A)  | 111.7      |
| N(11)-C(36)-H(36B)  | 111.8      |
| C(35)-C(36)-H(36B)  | 111.8      |
| H(36A)-C(36)-H(36B) | 109.5      |
| N(11)-C(36)-H(36C)  | 79.2       |
| C(35)-C(36)-H(36C)  | 105.7      |
| H(36A)-C(36)-H(36C) | 35.4       |
| H(36B)-C(36)-H(36C) | 137.7      |
| N(11)-C(36)-H(36D)  | 73.6       |



|                     |          |
|---------------------|----------|
| C(35)-C(36)-H(36D)  | 135.2    |
| H(36A)-C(36)-H(36D) | 111.6    |
| H(36B)-C(36)-H(36D) | 41.2     |
| H(36C)-C(36)-H(36D) | 116.0    |
| N(11)-C(37)-C(38)   | 109.5    |
| N(11)-C(37)-H(37A)  | 109.8    |
| C(38)-C(37)-H(37A)  | 109.8    |
| N(11)-C(37)-H(37B)  | 109.8    |
| C(38)-C(37)-H(37B)  | 109.8    |
| H(37A)-C(37)-H(37B) | 108.2    |
| N(11)-C(37)-H(37C)  | 112.1    |
| C(38)-C(37)-H(37C)  | 109.4    |
| H(37A)-C(37)-H(37C) | 2.5      |
| H(37B)-C(37)-H(37C) | 106.2    |
| N(11)-C(37)-H(37D)  | 129.7    |
| C(38)-C(37)-H(37D)  | 107.6    |
| H(37A)-C(37)-H(37D) | 87.7     |
| H(37B)-C(37)-H(37D) | 23.6     |
| H(37C)-C(37)-H(37D) | 85.5     |
| C(37)-C(38)-C(39)   | 137.4    |
| C(37)-C(38)-H(38A)  | 102.8    |
| C(39)-C(38)-H(38A)  | 102.8    |
| C(37)-C(38)-H(38B)  | 102.8    |
| C(39)-C(38)-H(38B)  | 102.8    |
| H(38A)-C(38)-H(38B) | 105.0    |
| C(37)-C(38)-H(38C)  | 107.6    |
| C(39)-C(38)-H(38C)  | 82.8     |
| H(38A)-C(38)-H(38C) | 26.4     |
| H(38B)-C(38)-H(38C) | 126.9    |
| C(37)-C(38)-H(38D)  | 118.0    |
| C(39)-C(38)-H(38D)  | 103.7    |
| H(38A)-C(38)-H(38D) | 64.3     |
| H(38B)-C(38)-H(38D) | 41.5     |
| H(38C)-C(38)-H(38D) | 85.5     |
| C(42)-C(43)-N(11)   | 111.7(5) |
| C(42)-C(43)-H(43A)  | 109.3    |
| N(11)-C(43)-H(43A)  | 109.4    |

|                      |            |
|----------------------|------------|
| C(42)-C(43)-H(43B)   | 109.0      |
| N(11)-C(43)-H(43B)   | 109.4      |
| H(43A)-C(43)-H(43B)  | 108.0      |
| C(42)-C(43)-H(43D)   | 108.7      |
| N(11)-C(43)-H(43D)   | 126.2      |
| H(43A)-C(43)-H(43D)  | 21.3       |
| H(43B)-C(43)-H(43D)  | 88.8       |
| C(37A)-N(11A)-C(43A) | 128.2      |
| C(37A)-N(11A)-C(36A) | 91.9       |
| C(43A)-N(11A)-C(36A) | 118.3      |
| C(37A)-N(11A)-Cu(3)  | 118.05(15) |
| C(43A)-N(11A)-Cu(3)  | 105.10(14) |
| C(36A)-N(11A)-Cu(3)  | 87.51(17)  |
| N(11A)-C(36A)-C(35)  | 130.5      |
| N(11A)-C(36A)-H(36A) | 130.0      |
| C(35)-C(36A)-H(36A)  | 93.9       |
| N(11A)-C(36A)-H(36B) | 124.2      |
| C(35)-C(36A)-H(36B)  | 85.6       |
| H(36A)-C(36A)-H(36B) | 72.8       |
| N(11A)-C(36A)-H(36C) | 104.6      |
| C(35)-C(36A)-H(36C)  | 104.6      |
| H(36A)-C(36A)-H(36C) | 31.9       |
| H(36B)-C(36A)-H(36C) | 103.6      |
| N(11A)-C(36A)-H(36D) | 104.6      |
| C(35)-C(36A)-H(36D)  | 104.6      |
| H(36A)-C(36A)-H(36D) | 79.7       |
| H(36B)-C(36A)-H(36D) | 20.7       |
| H(36C)-C(36A)-H(36D) | 105.7      |
| N(11A)-C(37A)-C(38A) | 82.6       |
| N(11A)-C(37A)-H(37A) | 106.2      |
| C(38A)-C(37A)-H(37A) | 116.0      |
| N(11A)-C(37A)-H(37B) | 87.0       |
| C(38A)-C(37A)-H(37B) | 112.8      |
| H(37A)-C(37A)-H(37B) | 130.6      |
| N(11A)-C(37A)-H(37C) | 114.9      |
| C(38A)-C(37A)-H(37C) | 114.9      |
| H(37A)-C(37A)-H(37C) | 8.7        |

|                      |          |
|----------------------|----------|
| H(37B)-C(37A)-H(37C) | 129.4    |
| N(11A)-C(37A)-H(37D) | 114.9    |
| C(38A)-C(37A)-H(37D) | 114.9    |
| H(37A)-C(37A)-H(37D) | 117.0    |
| H(37B)-C(37A)-H(37D) | 27.9     |
| H(37C)-C(37A)-H(37D) | 111.9    |
| C(39)-C(38A)-C(37A)  | 135.1    |
| C(39)-C(38A)-H(38A)  | 131.1    |
| C(37A)-C(38A)-H(38A) | 92.3     |
| C(39)-C(38A)-H(38B)  | 93.1     |
| C(37A)-C(38A)-H(38B) | 92.9     |
| H(38A)-C(38A)-H(38B) | 96.2     |
| C(39)-C(38A)-H(38C)  | 103.4    |
| C(37A)-C(38A)-H(38C) | 103.4    |
| H(38A)-C(38A)-H(38C) | 42.2     |
| H(38B)-C(38A)-H(38C) | 134.8    |
| C(39)-C(38A)-H(38D)  | 103.4    |
| C(37A)-C(38A)-H(38D) | 103.4    |
| H(38A)-C(38A)-H(38D) | 68.4     |
| H(38B)-C(38A)-H(38D) | 29.5     |
| H(38C)-C(38A)-H(38D) | 105.2    |
| N(11A)-C(43A)-C(42)  | 104.2(5) |
| N(11A)-C(43A)-H(43A) | 91.9     |
| C(42)-C(43A)-H(43A)  | 122.0    |
| N(11A)-C(43A)-H(43C) | 111.0    |
| C(42)-C(43A)-H(43C)  | 111.2    |
| H(43A)-C(43A)-H(43C) | 113.8    |
| N(11A)-C(43A)-H(43D) | 110.9    |
| C(42)-C(43A)-H(43D)  | 110.5    |
| H(43A)-C(43A)-H(43D) | 19.6     |
| H(43C)-C(43A)-H(43D) | 109.0    |
| C(38A)-C(39)-C(38)   | 15.3     |
| C(38A)-C(39)-N(9)    | 124.8(4) |
| C(38)-C(39)-N(9)     | 110.5(4) |
| C(38A)-C(39)-H(39A)  | 106.0    |
| C(38)-C(39)-H(39A)   | 109.5    |

|                     |           |
|---------------------|-----------|
| N(9)-C(39)-H(39A)   | 109.5     |
| C(38A)-C(39)-H(39B) | 97.3      |
| C(38)-C(39)-H(39B)  | 109.5     |
| N(9)-C(39)-H(39B)   | 109.8     |
| H(39A)-C(39)-H(39B) | 108.1     |
| C(41)-C(40)-N(9)    | 113.8(10) |
| C(41)-C(40)-H(40A)  | 108.8     |
| N(9)-C(40)-H(40A)   | 108.8     |
| C(41)-C(40)-H(40B)  | 108.8     |
| N(9)-C(40)-H(40B)   | 108.8     |
| H(40A)-C(40)-H(40B) | 107.7     |
| C(40)-C(41)-N(10)   | 111.6(9)  |
| C(40)-C(41)-H(41A)  | 109.3     |
| N(10)-C(41)-H(41A)  | 109.3     |
| C(40)-C(41)-H(41B)  | 109.3     |
| N(10)-C(41)-H(41B)  | 109.3     |
| H(41A)-C(41)-H(41B) | 108.0     |
| C(43)-C(42)-N(10)   | 119.8(8)  |
| C(43)-C(42)-C(43A)  | 35.9(2)   |
| N(10)-C(42)-C(43A)  | 109.4(8)  |
| C(43)-C(42)-H(42A)  | 107.4     |
| N(10)-C(42)-H(42A)  | 107.4     |
| C(43A)-C(42)-H(42A) | 79.4      |
| C(43)-C(42)-H(42B)  | 107.4     |
| N(10)-C(42)-H(42B)  | 107.4     |
| C(43A)-C(42)-H(42B) | 138.6     |
| H(42A)-C(42)-H(42B) | 106.9     |
| N(10)-C(44)-C(45)   | 112.9(10) |
| N(10)-C(44)-H(44A)  | 109.0     |
| C(45)-C(44)-H(44A)  | 109.0     |
| N(10)-C(44)-H(44B)  | 109.0     |
| C(45)-C(44)-H(44B)  | 109.0     |
| H(44A)-C(44)-H(44B) | 107.8     |
| C(44)-C(45)-N(12)   | 110.9(9)  |
| C(44)-C(45)-H(45A)  | 109.5     |
| N(12)-C(45)-H(45A)  | 109.5     |
| C(44)-C(45)-H(45B)  | 109.5     |

|                     |       |
|---------------------|-------|
| N(12)-C(45)-H(45B)  | 109.5 |
| H(45A)-C(45)-H(45B) | 108.0 |

---

Symmetry transformations used to generate equivalent atoms:

#1  $x, -y+1/2, z+1/2$  #2  $x, -y+1/2, z-1/2$

Table S9. Anisotropic displacement parameters ( $\text{\AA}^2 \times 10^3$ ) for **12**. The anisotropic displacement factor exponent takes the form:  $-2\pi^2[ h^2 a^*U^{11} + \dots + 2 h k a^* b^* U^{12} ]$

|       | U <sup>11</sup> | U <sup>22</sup> | U <sup>33</sup> | U <sup>23</sup> | U <sup>13</sup> | U <sup>12</sup> |
|-------|-----------------|-----------------|-----------------|-----------------|-----------------|-----------------|
| Cu(1) | 21(1)           | 20(1)           | 19(1)           | 5(1)            | 9(1)            | 3(1)            |
| Cu(2) | 19(1)           | 22(1)           | 18(1)           | 1(1)            | 6(1)            | 0(1)            |
| Cu(3) | 23(1)           | 50(1)           | 45(1)           | 17(1)           | 4(1)            | -8(1)           |
| Cl(1) | 25(1)           | 24(1)           | 30(1)           | 1(1)            | 8(1)            | 3(1)            |
| Cl(3) | 42(1)           | 53(1)           | 43(1)           | -4(1)           | 10(1)           | -12(1)          |
| Cl(2) | 39(1)           | 60(1)           | 28(1)           | -16(1)          | 3(1)            | 8(1)            |
| Na(1) | 24(1)           | 29(2)           | 27(1)           | 6(1)            | 8(1)            | -1(1)           |
| Na(2) | 24(1)           | 32(2)           | 23(1)           | 7(1)            | 11(1)           | 5(1)            |
| Na(3) | 29(1)           | 28(2)           | 25(1)           | 1(1)            | 10(1)           | 1(1)            |
| O(1)  | 28(2)           | 25(3)           | 23(2)           | 2(2)            | 14(2)           | -1(2)           |
| O(2)  | 27(2)           | 19(2)           | 24(2)           | 2(2)            | 13(2)           | -2(2)           |
| O(3)  | 29(2)           | 18(2)           | 24(2)           | -1(2)           | 6(2)            | -2(2)           |
| O(4)  | 26(3)           | 51(4)           | 36(3)           | 13(3)           | 3(2)            | 4(2)            |
| O(5)  | 37(3)           | 25(3)           | 28(3)           | 6(2)            | 16(2)           | 7(2)            |
| O(6)  | 32(3)           | 22(3)           | 24(2)           | 2(2)            | 16(2)           | 5(2)            |
| O(7)  | 25(2)           | 34(3)           | 24(2)           | -3(2)           | 7(2)            | -1(2)           |
| O(8)  | 21(3)           | 79(5)           | 36(3)           | -2(3)           | 1(2)            | 4(3)            |
| O(9)  | 23(2)           | 32(3)           | 38(3)           | 11(2)           | 12(2)           | 3(2)            |
| O(10) | 20(2)           | 54(4)           | 28(3)           | 2(3)            | 8(2)            | -2(2)           |
| O(11) | 32(3)           | 41(3)           | 50(3)           | 9(3)            | 17(3)           | -5(3)           |
| O(12) | 103(6)          | 46(5)           | 219(11)         | -50(6)          | 114(7)          | -26(5)          |
| O(13) | 53(4)           | 136(8)          | 47(4)           | -10(5)          | 7(3)            | 1(5)            |
| O(14) | 106(6)          | 105(6)          | 32(3)           | 7(4)            | 20(4)           | 78(5)           |
| O(17) | 36(3)           | 59(4)           | 49(4)           | 5(3)            | -9(3)           | 4(3)            |
| O(18) | 56(4)           | 39(4)           | 70(4)           | -7(3)           | 45(3)           | -8(3)           |
| O(19) | 46(3)           | 42(4)           | 56(4)           | 27(3)           | 7(3)            | 12(3)           |
| O(20) | 66(4)           | 38(3)           | 60(4)           | -17(3)          | 28(3)           | 13(3)           |
| O(25) | 27(2)           | 30(3)           | 31(3)           | -7(2)           | 12(2)           | -3(2)           |
| O(26) | 29(2)           | 23(3)           | 23(2)           | 0(2)            | 8(2)            | 1(2)            |
| N(1)  | 26(3)           | 16(3)           | 15(3)           | 0(2)            | 7(2)            | 3(2)            |
| N(2)  | 23(3)           | 29(3)           | 19(3)           | 2(3)            | 9(2)            | 0(2)            |
| N(3)  | 26(3)           | 51(4)           | 32(4)           | -18(3)          | -1(3)           | 11(3)           |

|       |       |        |       |        |       |        |
|-------|-------|--------|-------|--------|-------|--------|
| N(4)  | 26(3) | 24(3)  | 25(3) | -3(3)  | 13(2) | 0(2)   |
| N(5)  | 22(3) | 22(3)  | 19(3) | 0(2)   | 7(2)  | 2(2)   |
| N(6)  | 20(3) | 31(3)  | 26(3) | 4(3)   | 9(2)  | 2(2)   |
| N(7)  | 28(3) | 18(3)  | 18(3) | -2(2)  | 7(2)  | -5(2)  |
| N(8)  | 34(3) | 23(3)  | 24(3) | -1(3)  | 3(3)  | -3(3)  |
| N(9)  | 59(5) | 43(5)  | 49(5) | 6(4)   | 2(4)  | -18(4) |
| N(10) | 39(4) | 72(6)  | 54(5) | 22(5)  | 4(4)  | -14(4) |
| N(12) | 35(4) | 119(9) | 77(6) | 37(6)  | 39(4) | 27(5)  |
| C(1)  | 22(3) | 20(3)  | 12(3) | -4(3)  | 3(2)  | 1(3)   |
| C(2)  | 28(3) | 22(4)  | 23(3) | 1(3)   | 12(3) | -2(3)  |
| C(3)  | 29(4) | 32(4)  | 22(4) | -1(3)  | 7(3)  | -4(3)  |
| C(4)  | 23(3) | 35(4)  | 30(4) | 7(3)   | 9(3)  | 4(3)   |
| C(5)  | 48(4) | 28(4)  | 25(4) | 0(3)   | 24(3) | -1(3)  |
| C(6)  | 57(5) | 37(5)  | 49(5) | 0(4)   | 26(4) | 11(4)  |
| C(7)  | 41(5) | 50(6)  | 74(7) | -9(5)  | 21(5) | 9(4)   |
| C(8)  | 37(4) | 37(5)  | 30(4) | -7(4)  | 10(3) | 8(4)   |
| C(9)  | 41(4) | 17(4)  | 26(4) | -1(3)  | 8(3)  | -1(3)  |
| C(10) | 25(3) | 25(4)  | 20(3) | 4(3)   | 9(3)  | 1(3)   |
| C(11) | 30(4) | 32(4)  | 17(3) | -5(3)  | 9(3)  | 0(3)   |
| C(12) | 23(4) | 45(5)  | 38(4) | 1(4)   | 12(3) | -1(3)  |
| C(13) | 28(4) | 57(6)  | 32(4) | -13(4) | 6(3)  | 14(4)  |
| C(14) | 37(4) | 30(4)  | 38(4) | -4(4)  | 16(3) | -6(3)  |
| C(15) | 32(4) | 31(4)  | 35(4) | 2(3)   | 15(3) | -2(3)  |
| C(16) | 25(3) | 22(4)  | 18(3) | 3(3)   | 8(3)  | 2(3)   |
| C(17) | 30(4) | 23(4)  | 20(3) | 4(3)   | 9(3)  | 1(3)   |
| C(18) | 27(4) | 40(5)  | 30(4) | 2(4)   | 11(3) | -4(3)  |
| C(19) | 26(4) | 42(5)  | 30(4) | 5(4)   | 9(3)  | 2(3)   |
| C(20) | 26(4) | 37(4)  | 36(4) | 4(4)   | 14(3) | -1(3)  |
| C(21) | 39(4) | 33(4)  | 32(4) | 3(4)   | 15(3) | -9(3)  |
| C(22) | 48(5) | 22(4)  | 34(4) | 1(3)   | 8(4)  | -2(3)  |
| C(23) | 42(4) | 22(4)  | 30(4) | 1(3)   | 8(3)  | 6(3)   |
| C(24) | 37(4) | 22(4)  | 27(4) | -1(3)  | 11(3) | 4(3)   |
| C(25) | 17(3) | 36(4)  | 27(4) | 0(3)   | 5(3)  | 1(3)   |
| C(26) | 24(3) | 29(4)  | 30(4) | 1(3)   | 3(3)  | -8(3)  |
| C(27) | 27(4) | 34(4)  | 21(3) | 6(3)   | -3(3) | 3(3)   |
| C(28) | 44(4) | 27(4)  | 26(4) | 3(3)   | 3(3)  | -3(3)  |
| C(29) | 37(4) | 30(4)  | 28(4) | -5(3)  | 13(3) | -7(3)  |

|       |         |         |         |        |        |         |
|-------|---------|---------|---------|--------|--------|---------|
| C(30) | 39(4)   | 24(4)   | 31(4)   | -4(3)  | 15(3)  | -1(3)   |
| C(31) | 33(4)   | 23(4)   | 27(4)   | 15(3)  | 9(3)   | 2(3)    |
| C(32) | 47(5)   | 35(5)   | 40(5)   | -2(4)  | 6(4)   | -5(4)   |
| C(33) | 37(5)   | 49(6)   | 116(9)  | -22(7) | 42(6)  | -7(4)   |
| C(34) | 55(6)   | 108(10) | 77(8)   | -31(7) | 32(6)  | 24(7)   |
| C(35) | 43(6)   | 89(9)   | 225(17) | 94(11) | 78(8)  | 42(6)   |
| C(39) | 94(10)  | 150(14) | 76(9)   | -55(9) | -11(7) | -44(10) |
| C(40) | 131(11) | 44(7)   | 100(10) | 14(7)  | 40(9)  | -23(7)  |
| C(41) | 52(6)   | 48(6)   | 71(7)   | 18(5)  | 14(5)  | -1(5)   |
| C(42) | 56(6)   | 89(9)   | 86(8)   | 44(7)  | -7(6)  | -34(6)  |
| C(44) | 56(6)   | 92(9)   | 71(8)   | 28(7)  | 23(6)  | 7(6)    |
| C(45) | 78(8)   | 120(12) | 103(10) | 8(9)   | 61(8)  | 34(8)   |

---



Table S10. Hydrogen coordinates ( $\times 10^4$ ) and isotropic displacement parameters ( $\text{\AA}^2 \times 10^{-3}$ ) for **12**.

|        | x    | y    | z     | U(eq) |
|--------|------|------|-------|-------|
| H(2A)  | 4320 | 911  | 519   | 28    |
| H(2B)  | 3850 | 891  | -677  | 28    |
| H(4A)  | 4204 | 2539 | -3605 | 35    |
| H(4B)  | 4258 | 2624 | -2370 | 35    |
| H(5A)  | 5235 | 2134 | -4039 | 37    |
| H(5B)  | 4693 | 1671 | -3979 | 37    |
| H(6A)  | 6141 | 1629 | -3187 | 54    |
| H(6B)  | 5646 | 1192 | -3925 | 54    |
| H(7A)  | 5795 | 354  | -2831 | 65    |
| H(7B)  | 5021 | 577  | -3164 | 65    |
| H(8A)  | 5747 | 262  | -1081 | 41    |
| H(8B)  | 5201 | -114 | -1876 | 41    |
| H(9A)  | 4685 | 176  | -684  | 34    |
| H(9B)  | 4328 | 495  | -1750 | 34    |
| H(10A) | 5866 | 788  | 175   | 28    |
| H(10B) | 5422 | 919  | 989   | 28    |
| H(11A) | 5466 | 1858 | 672   | 31    |
| H(11B) | 6241 | 1633 | 956   | 31    |
| H(12A) | 6659 | 1895 | -1259 | 42    |
| H(12B) | 6839 | 1539 | -197  | 42    |
| H(13A) | 6732 | 1072 | -1898 | 47    |
| H(13B) | 6414 | 784  | -1043 | 47    |
| H(14A) | 6170 | 2610 | -539  | 41    |
| H(14B) | 5373 | 2550 | -588  | 41    |
| H(15A) | 5381 | 2886 | -2235 | 38    |
| H(15B) | 5958 | 2460 | -2347 | 38    |
| H(17A) | 2205 | 30   | 2677  | 28    |
| H(17B) | 2989 | 199  | 2823  | 28    |
| H(19A) | 913  | 766  | 4818  | 39    |
| H(19B) | 474  | 328  | 5260  | 39    |
| H(20A) | 893  | -226 | 6501  | 38    |

|        |       |       |       |     |
|--------|-------|-------|-------|-----|
| H(20B) | 1677  | -198  | 7198  | 38  |
| H(21A) | 1474  | -1084 | 6560  | 41  |
| H(21B) | 1157  | -874  | 5368  | 41  |
| H(22A) | 1883  | -1278 | 4559  | 42  |
| H(22B) | 2370  | -1595 | 5546  | 42  |
| H(23A) | 3318  | -1050 | 5311  | 38  |
| H(23B) | 3031  | -1498 | 4420  | 38  |
| H(24A) | 3224  | -762  | 3529  | 33  |
| H(24B) | 2410  | -795  | 3297  | 33  |
| H(25A) | 3742  | 280   | 4406  | 32  |
| H(25B) | 3802  | -249  | 5137  | 32  |
| H(26A) | 3874  | 474   | 6299  | 35  |
| H(26B) | 3245  | 786   | 5501  | 35  |
| H(27B) | 3498  | -231  | 7611  | 35  |
| H(27C) | 3623  | -474  | 6545  | 35  |
| H(28A) | 2999  | -1137 | 7002  | 40  |
| H(28B) | 2542  | -722  | 7462  | 40  |
| H(29A) | 2917  | 851   | 7119  | 37  |
| H(29B) | 2663  | 327   | 7631  | 37  |
| H(30A) | 1670  | 779   | 6984  | 36  |
| H(30B) | 1882  | 986   | 5957  | 36  |
| H(32A) | 1170  | 1673  | -937  | 50  |
| H(32B) | 1538  | 1124  | -430  | 50  |
| H(34A) | 489   | 2664  | 1854  | 93  |
| H(34B) | -158  | 3037  | 1294  | 93  |
| H(35A) | -1001 | 2574  | -218  | 133 |
| H(35B) | -1295 | 2592  | 795   | 133 |
| H(36A) | -1890 | 1961  | -666  | 63  |
| H(36B) | -1723 | 1711  | 478   | 63  |
| H(37A) | -1114 | 1779  | -1771 | 162 |
| H(37B) | -1588 | 1283  | -1757 | 162 |
| H(38A) | -776  | 957   | -2361 | 205 |
| H(38B) | -647  | 739   | -1234 | 205 |
| H(43A) | -1199 | 701   | -403  | 157 |
| H(43B) | -1633 | 994   | 245   | 157 |
| H(36C) | -1665 | 1906  | -902  | 155 |
| H(36D) | -1584 | 1605  | 148   | 155 |

|        |       |      |       |     |
|--------|-------|------|-------|-----|
| H(37C) | -1122 | 1858 | -1891 | 162 |
| H(37D) | -1634 | 1354 | -2096 | 162 |
| H(38C) | -624  | 1083 | -2666 | 61  |
| H(38D) | -695  | 730  | -1743 | 61  |
| H(43C) | -593  | 503  | -384  | 67  |
| H(43D) | -1360 | 578  | -381  | 67  |
| H(39A) | 326   | 723  | -1721 | 136 |
| H(39B) | 278   | 1363 | -1959 | 136 |
| H(40A) | 283   | 415  | -75   | 108 |
| H(40B) | 1095  | 518  | 314   | 108 |
| H(41A) | 1027  | 927  | 1800  | 69  |
| H(41B) | 537   | 407  | 1687  | 69  |
| H(42A) | -577  | 447  | 1073  | 99  |
| H(42B) | -889  | 894  | 1688  | 99  |
| H(44A) | 567   | 1563 | 2602  | 86  |
| H(44B) | -31   | 1224 | 2895  | 86  |
| H(45A) | -198  | 2198 | 2763  | 112 |
| H(45B) | -841  | 1839 | 2132  | 112 |

Crystal mounted on a CryoLoop<sup>®</sup> with Paratone-N<sup>®</sup> oil and immediately placed under a stream of N<sub>2</sub> on a Bruker SMART APEX CCD system. Data collected at -100 °C with Mo K $\alpha$  radiation and corrected for absorption using the APEX2 SADABS program. Structure solved by direct methods, developed by successive difference Fourier syntheses, and refined by full matrix least squares on all F<sup>2</sup> data. Following atoms were disordered over two positions, refined as isotropic with fixed bond distances to neighboring atoms yielding ratio occupancy of: carbon and nitrogen atoms C36, C37, C38, C43, N11 (55.53/44.47) and oxygen atoms O15, O16 (52.20/47.80), O21, O22, O23, O24 (43.88/56.12), and O27 (43.20/56.90). Carbon C37 and C37A were treated with fixed displacement parameters. All other non-hydrogen atoms were refined as being anisotropic and hydrogen atoms were placed in calculated positions with temperature factors fixed at 1.2 or 1.5 times the equivalent isotropic U of the C atoms to which they were bonded.

APEX2 (SMART, SAINT, SADABS) and SHELXTL programs were obtained from Bruker AXS Madison, WI.
